# Supplementary material for: Pyramid-Shaped Quantum Dot Superlattice Exhibiting Tunable Room-Temperature Superfluorescence via Oriented Attachment
Source: Research Square preprint supplement (doi:10.21203/rs.3.rs-4329418/v1), 2024-05-20
Supplement: Supplementary file 1 [file 00897ae9eb6c2d30c2e46cd9.docx]

**Supporting Information**

**Pyramid-Shaped Quantum Dot Superlattice Exhibiting Tunable Room-Temperature Superfluorescence via Oriented Attachment**

Zheng Liu,a,d Xiya Chen,a Ruizhao Yao,b Lihui Li,c Huanteng Luo,a Byung-Ryool Hyun,e Guangcan Li,*b Xiao Liu*a

a*Guangdong Provincial Key Laboratory of Chip and Integration Technology, School of Semiconductor Science and Technology, South China Normal University, Foshan 528225, P.R. China*

*bGuangdong Provincial Key Laboratory of Nanophotonic Functional Materials and Devices, School of Information and Optoelectronic Science and Engineering, South China Normal University, Guangzhou 510006, P. R. China*

c*Key Laboratory for Micro-Nano Physics and Technology of Hunan Province, College of Materials Science and Engineering, Hunan University, Changsha 410082, China*

*dCanton Supranano Quantum Tech.* *Co., Ltd.*

*eDepartment of Electrical and Electronic Engineering, Southern University of Science and Technology, Shenzhen 518055, P. R. China*

**Correspondence:* [*liuxiao@m.scnu.edu.cn*](mailto:liuxiao@m.scnu.edu.cn)*,* [*guangcan.li@m.scnu.edu.cn*](mailto:guangcan.li@m.scnu.edu.cn)

# 1. EXPERIMENTAL SECTION

**Self-assembly of QD superlattices.** TEM carbon grids in a glass vial 200 μL of QD nanocrystal solution and TEM carbon grids were added in a glass vial. The vial was then placed at an angle and the toluene solvent toluene was allowed to slowly evaporate. After 2 days, self-assembled QD nanocrystal superlattices were obtained. A certain amount of oleic acid was added to the QD nanocrystal solution, and the prepared solution was then dropped onto the Si wafer with some drops of toluene solvent around the wafer. Subsequently, a culture dish was used to cover the wafer. After 8 hours, a mesocrystalline superlattice was obtained after undergoing thermal annealing treatment.

**Transmission electron microscope characterization.** TEM and selected area electron diffraction images were obtained using a JEM-2100HR operating at 200 kV. TEM and HAADF-STEM images were obtained using a FEI Talos F200X operating at 200 kV.

**Scanning electron microscopy characterization.** SEM imaging of mesocrystalline QD superlatticess on Si/SiOx devices was performed with a ZEISS Gmeini 500 at 20 kV.

**Time-Resolved Photoluminescence.** TRPL experiments were performed using a confocal microscope (WITec, alpha-300) as the collection device, and the emission signal was reflected into astreak camera (C10910, Hamamatsu) by Ag mirrors. Ti:sapphire laser pulses at 400 nm (with a repetition rate of 80 MHz and a pulse width of 80 fs) were used as the light source. The 400 nm output was generated by an 800 nm laser from a mode-locked oscillator (Tsunami 3941-X1BB, Spectra-Physics) positioned after a BBO crystal. The laser beam was focused onto the sample with a spot diameter of∼3μm from the top by an objective lens (50×, Zeiss, 0.75 NA).

**Confocal fluorescence imaging.** The fast and completely integrated fluorescence lifetime imaging microscopy (FLIM) confocal platform was performed using Leica STELLARIS 8 FALCON, provided by Leica Microsystems (Shanghai) Trading Co., Ltd.

# 2. SUPPLEMENTARY FIGS


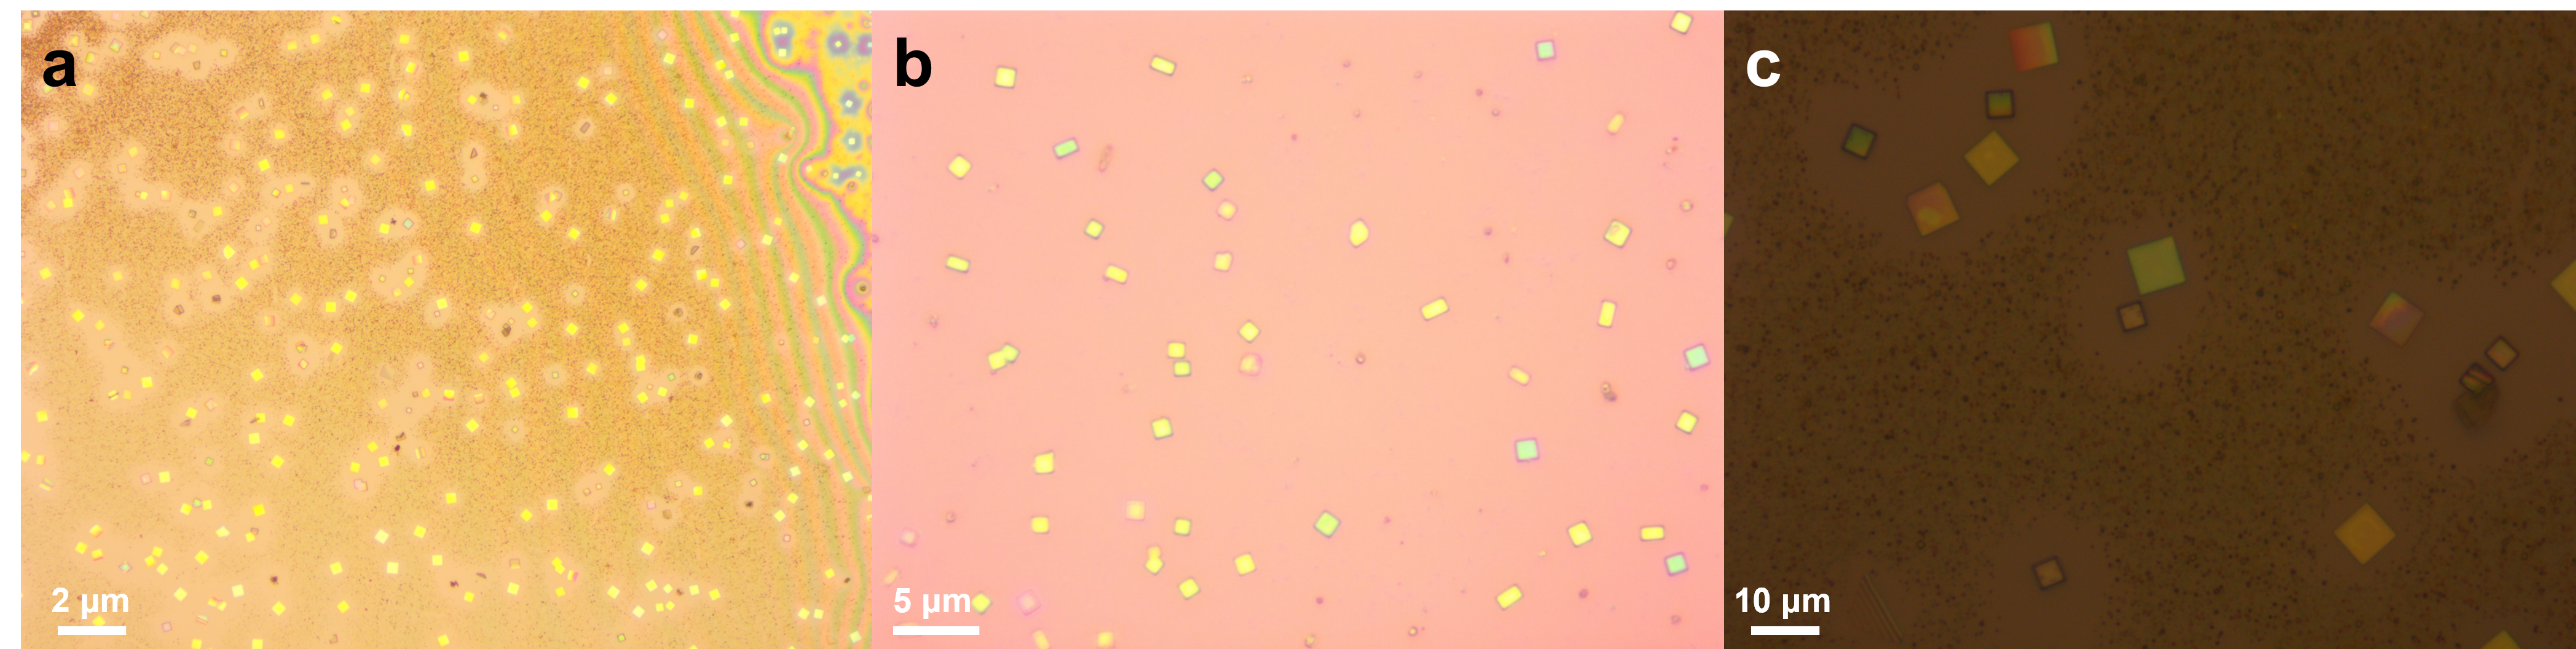


**Supplementary Fig. 1.** Optical microscope image of cube-shaped QD superlattices before annealing at a magnification of 10x (a), 20x (b), 50x (c).


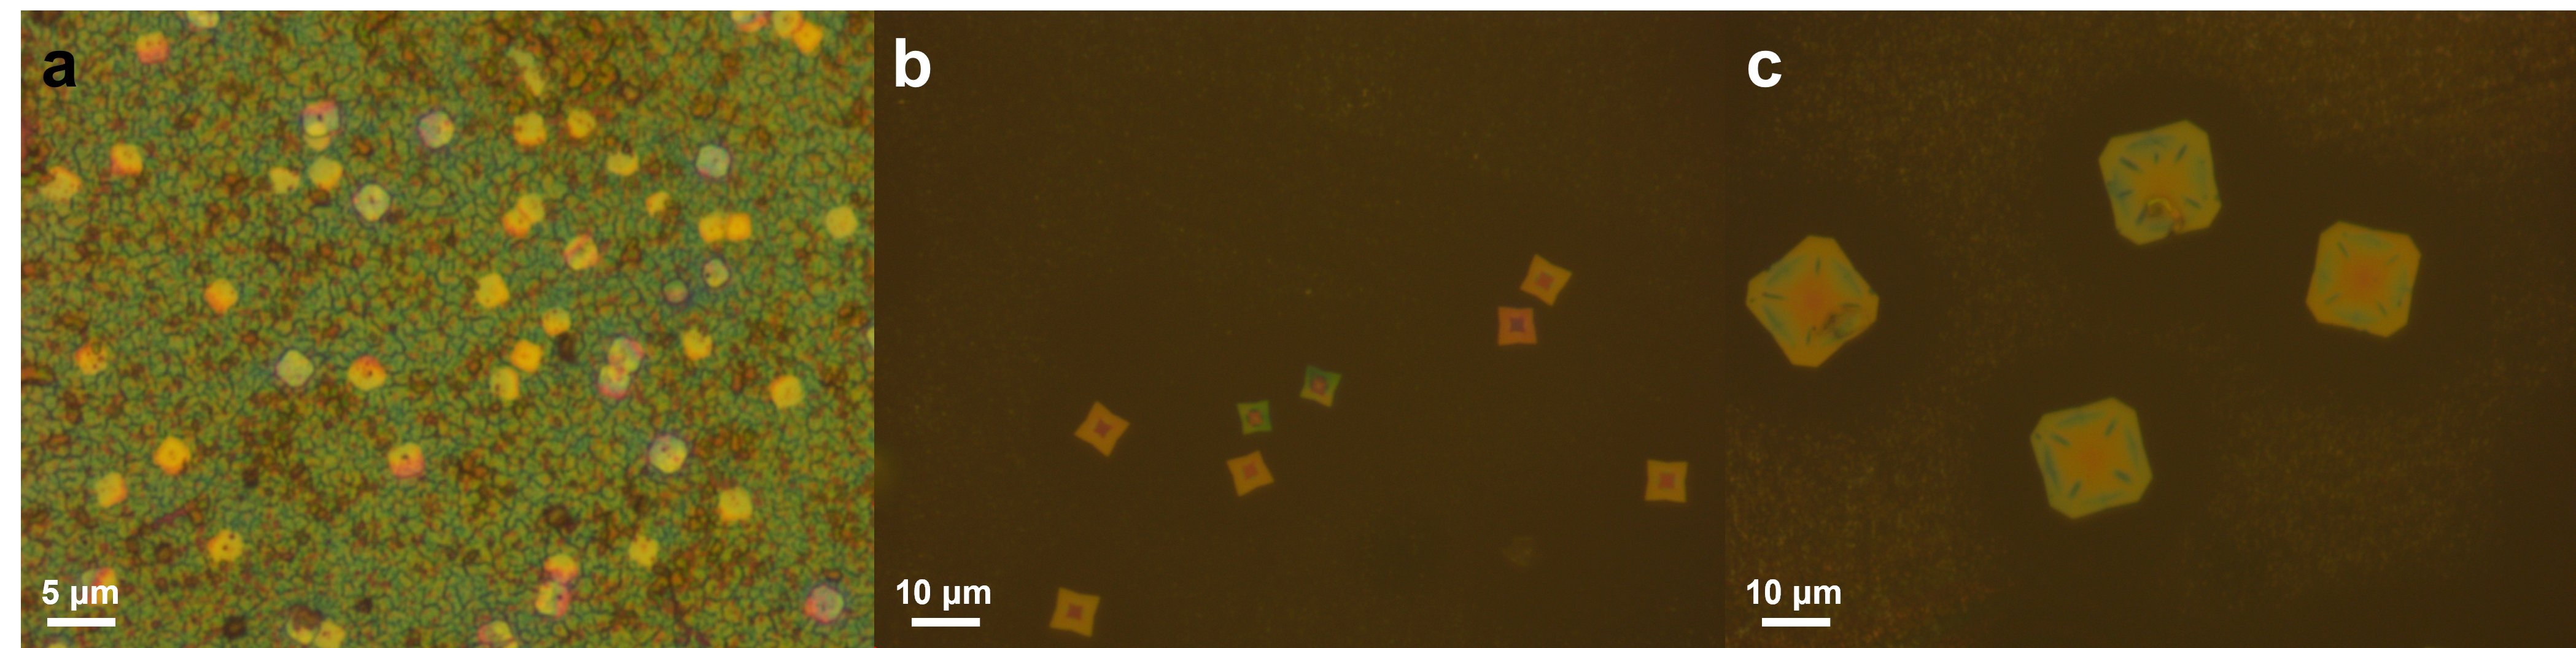


**Supplementary Fig. 2.** Optical microscope image of pyramid-shaped mesocrystalline QD superlattices after annealing at a magnification of 20x (a), 50x (b), 50x (c).


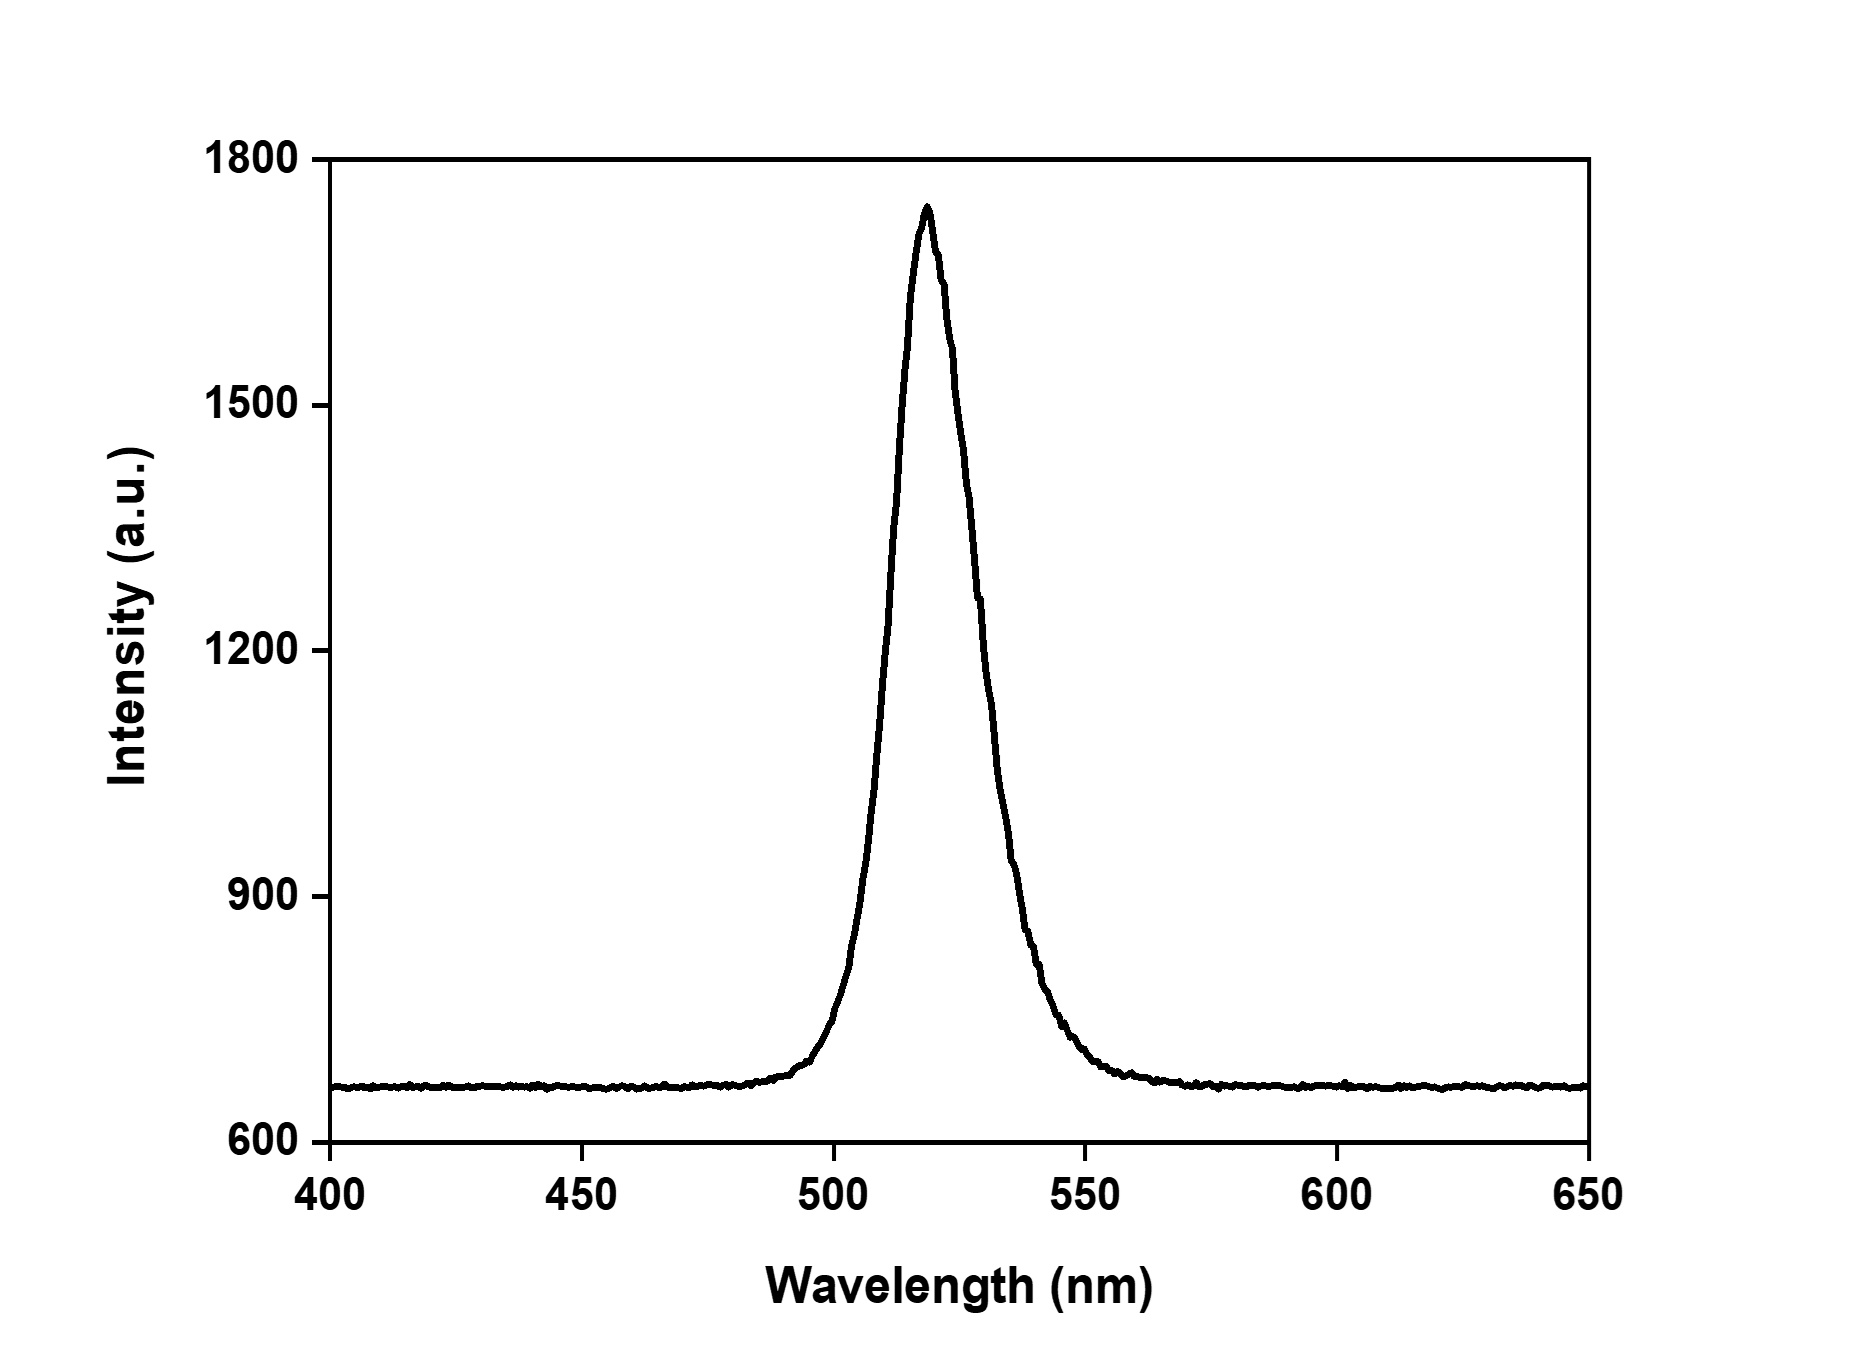


**Supplementary Fig. 3.** The PL spectrum of a single mesocrystalline QD superlatticess under an excitation density of 340 μJ/cm2 at 300K.


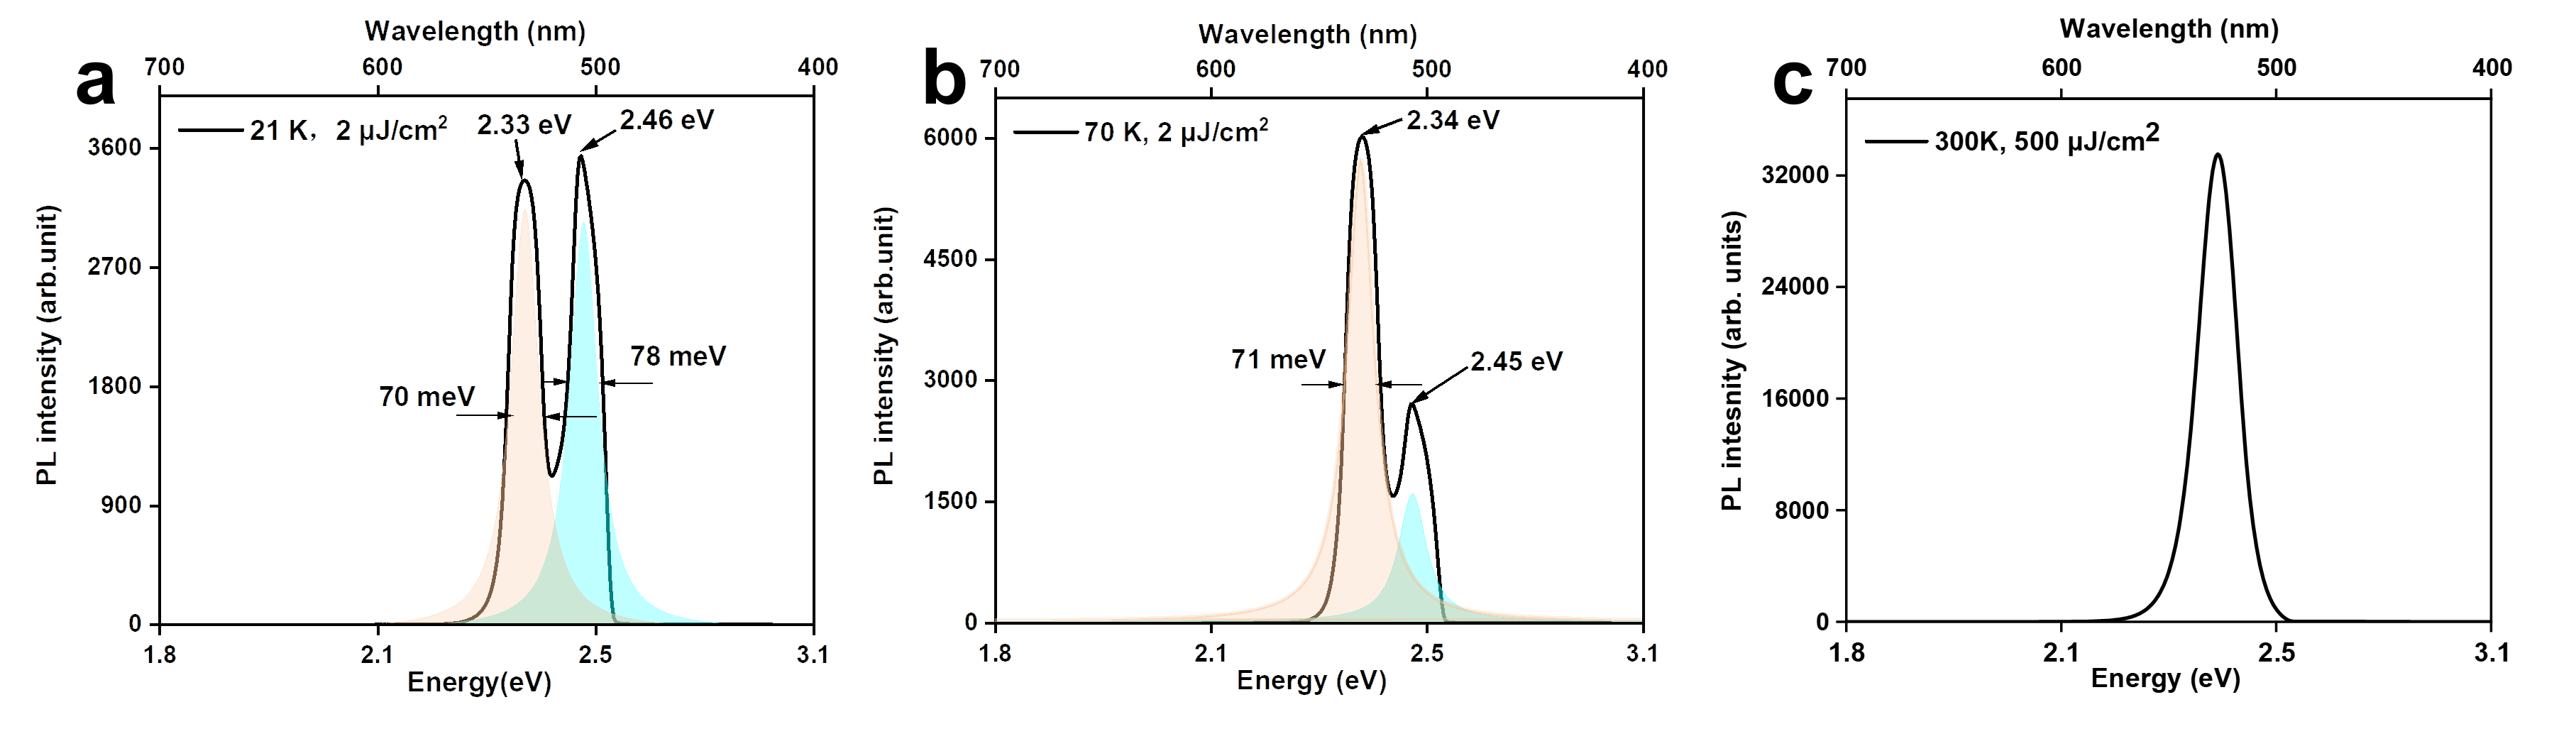


**Supplementary Fig. 4.** The PL spectrum of QD superlattices at 21 K (a), 70 K (b), and 300 K (c).


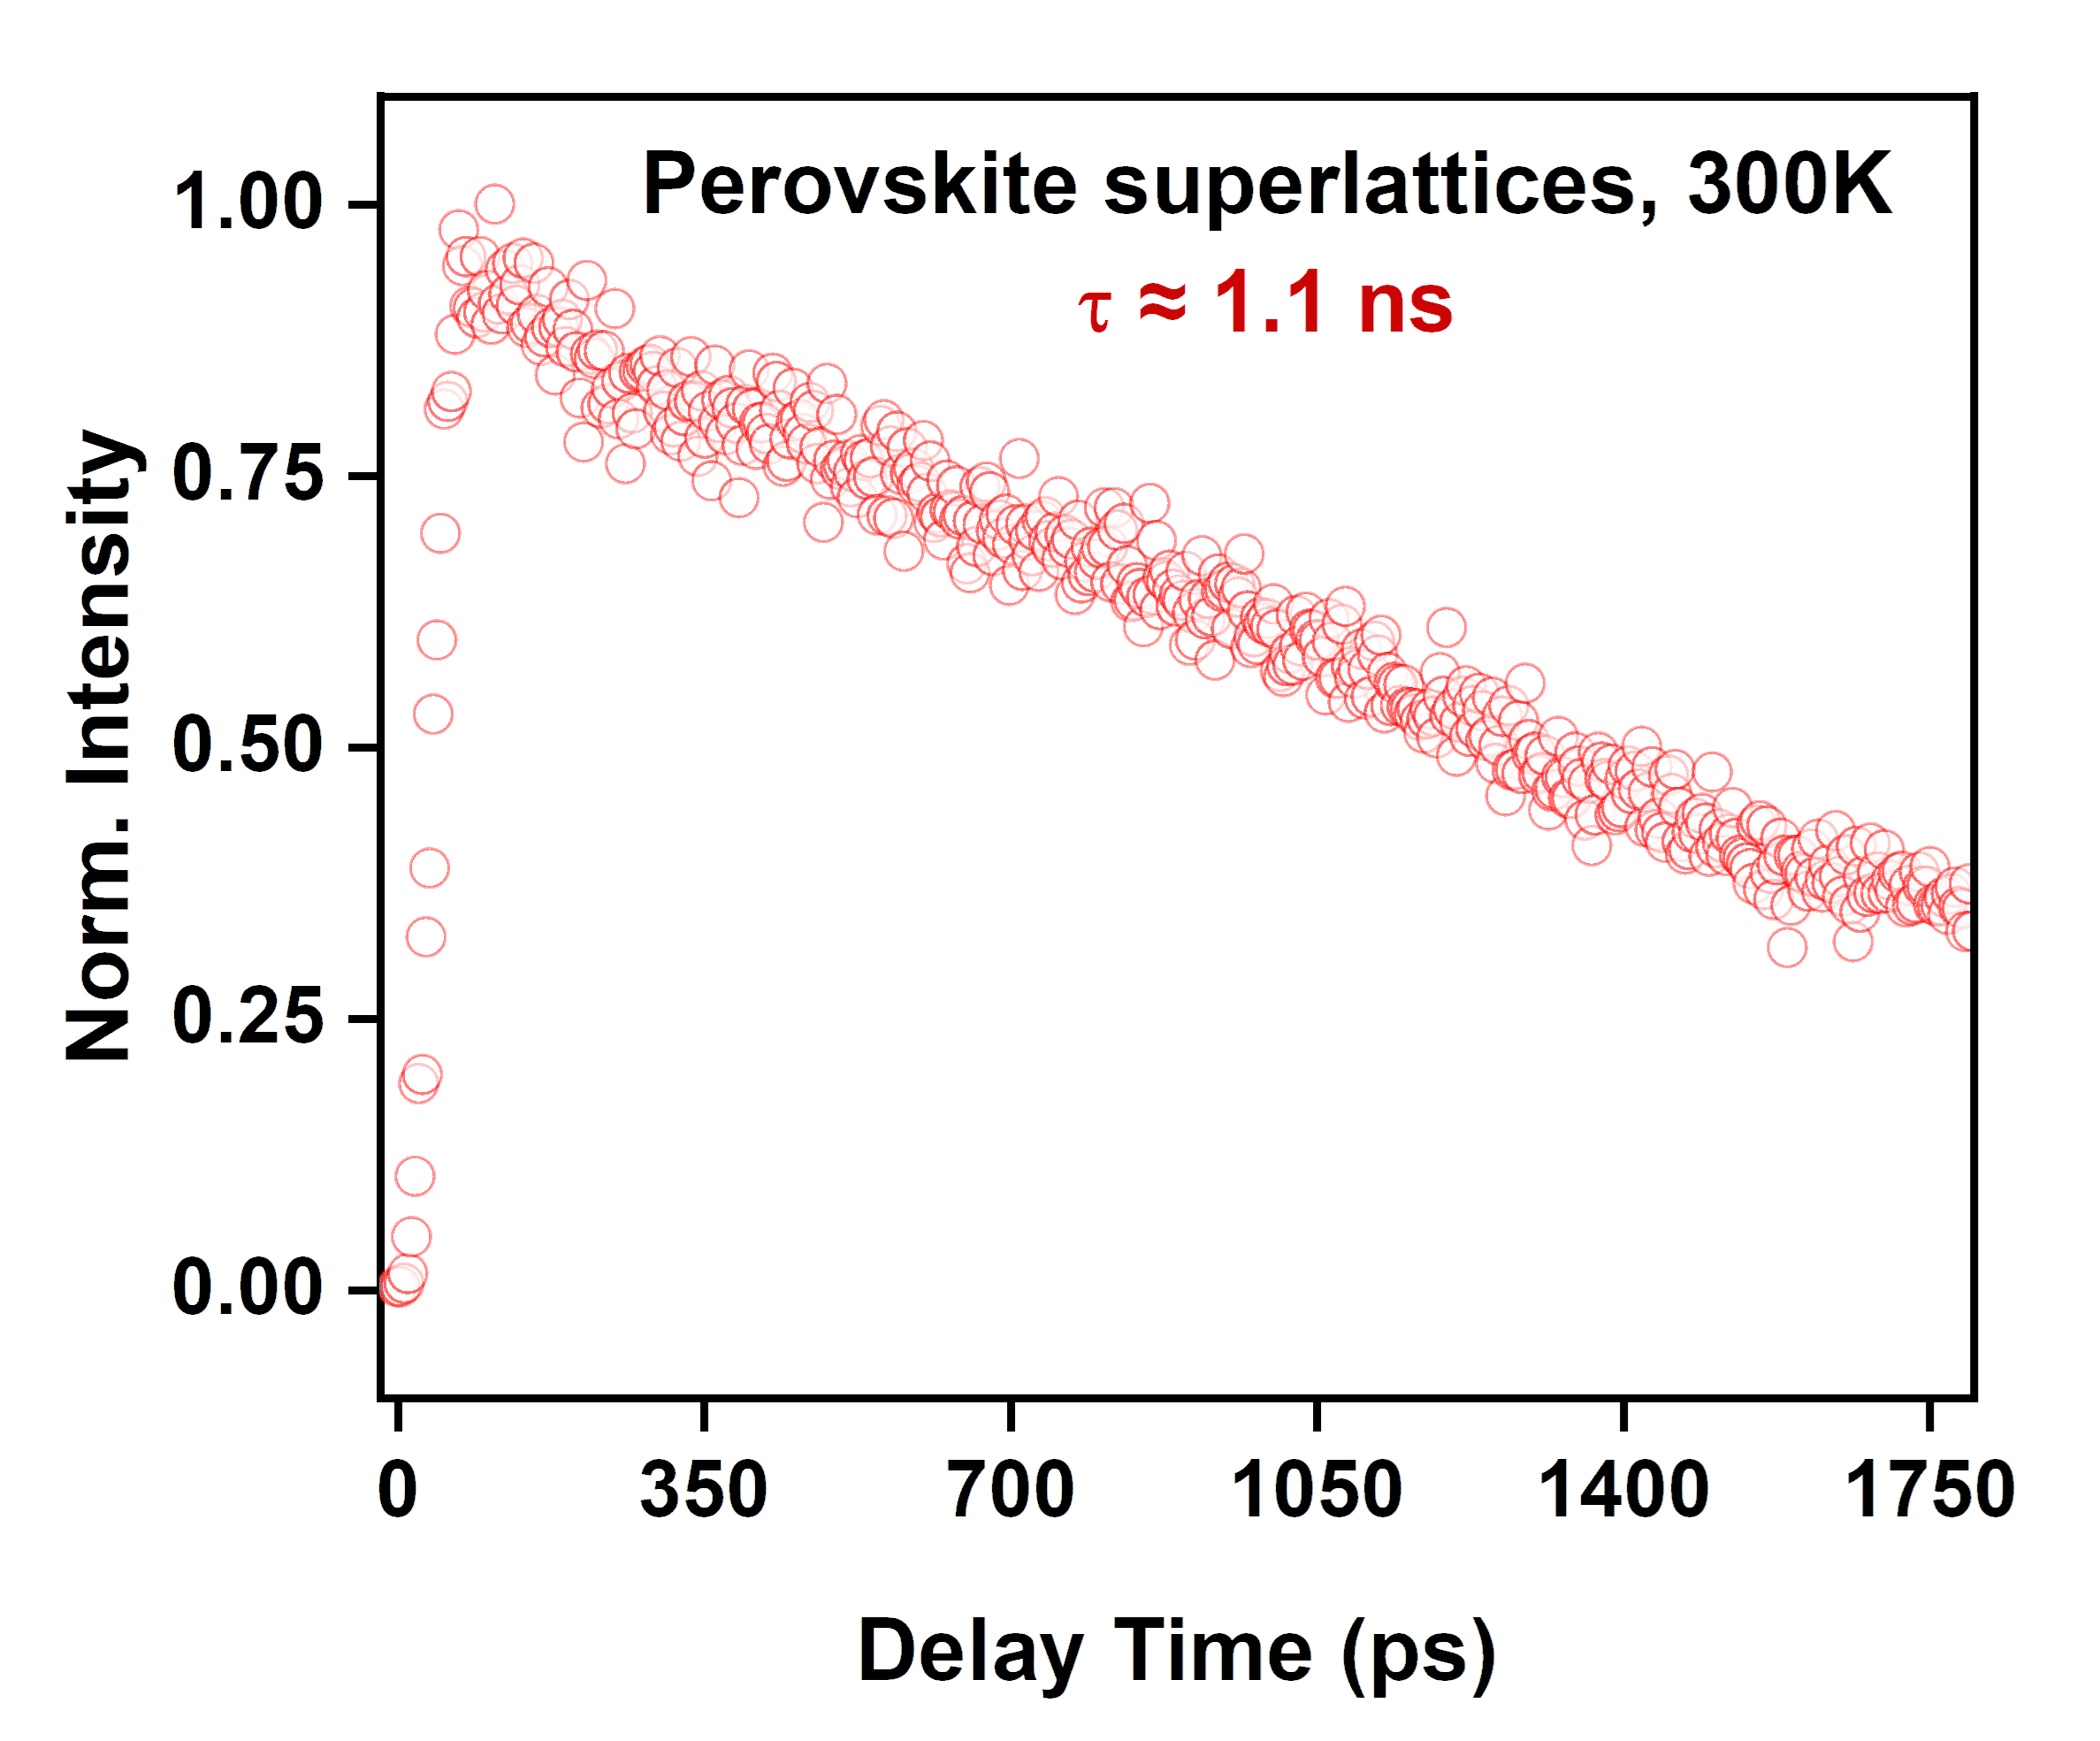


**Supplementary Fig. 5.** TRPL dynamics of the QD superlattices feature at 300 K.


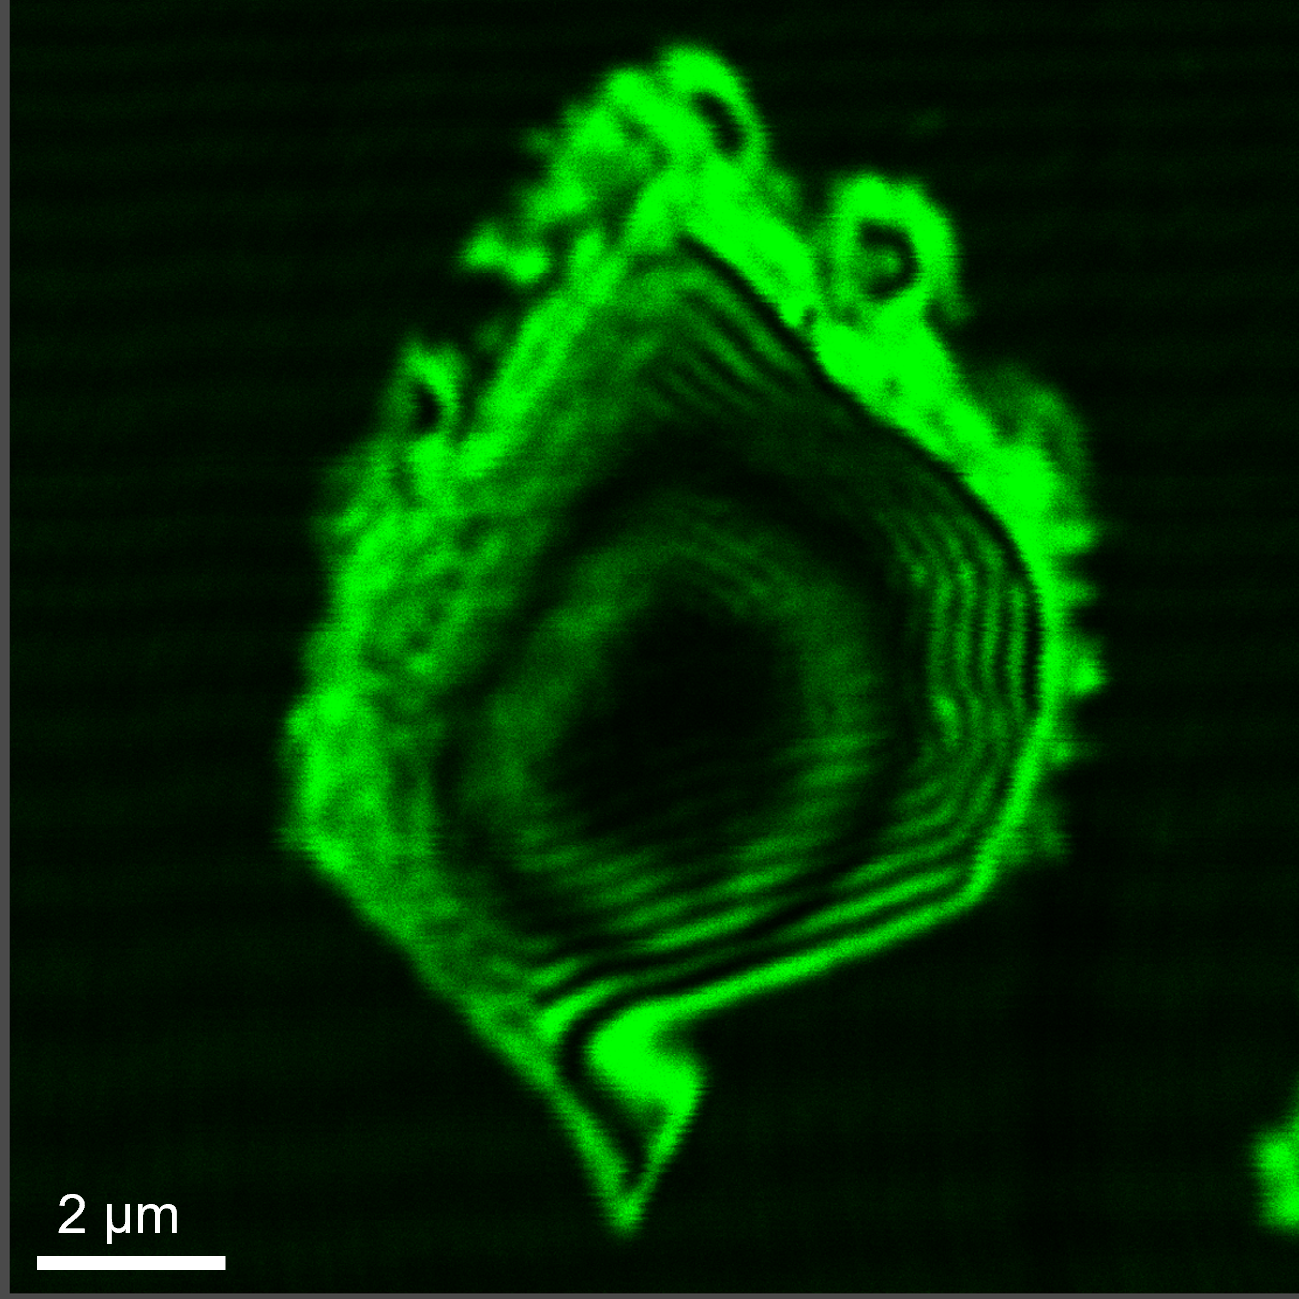


**Supplementary Fig. 6.** Confocal fluorescent imaging of mesocrystalline QD superlattices.


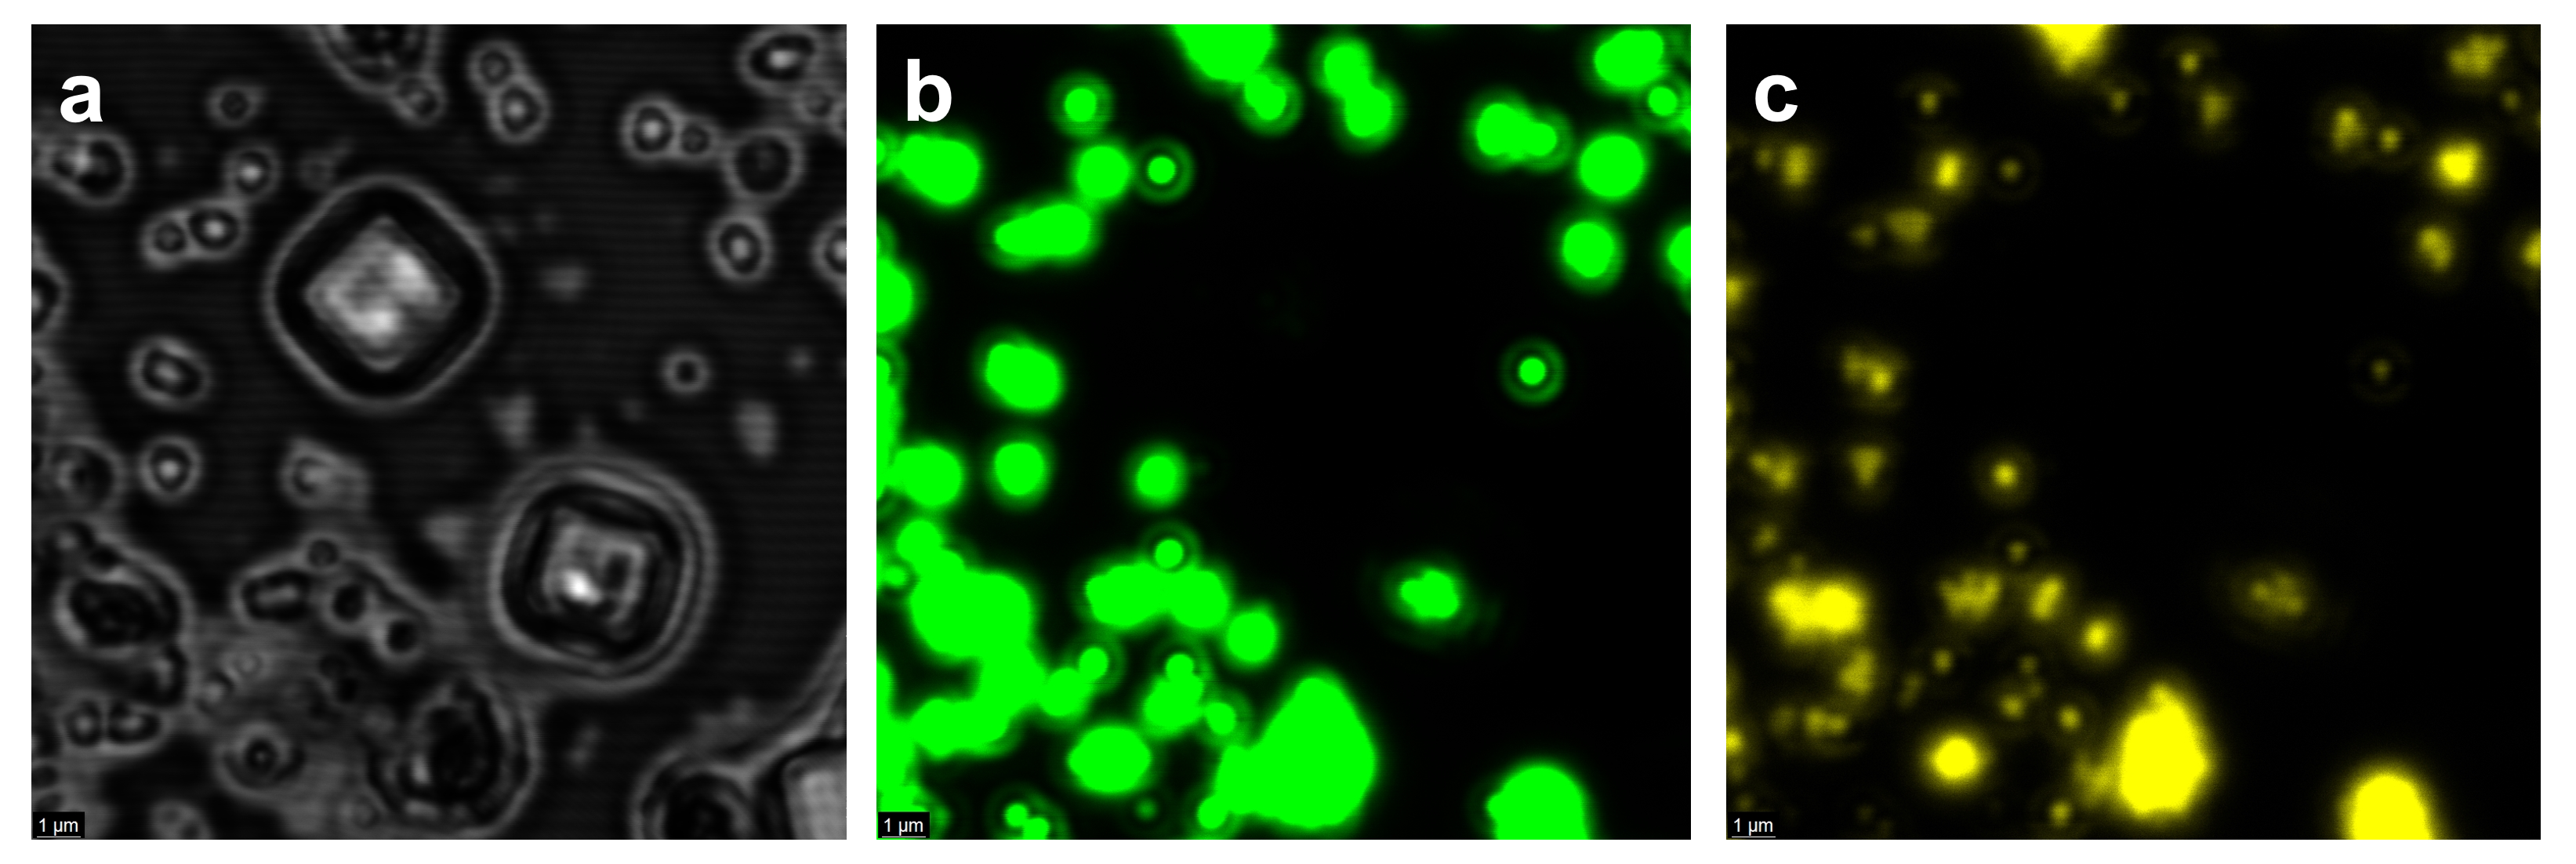


**Supplementary Fig. 7.** Optical images observed under dark field conditions (a), and confocal PL images in 2.2 eV (b) and 2.4 eV (c) channels of the same mesocrystalline QD superlattices were acquired using a confocal PL microscope.


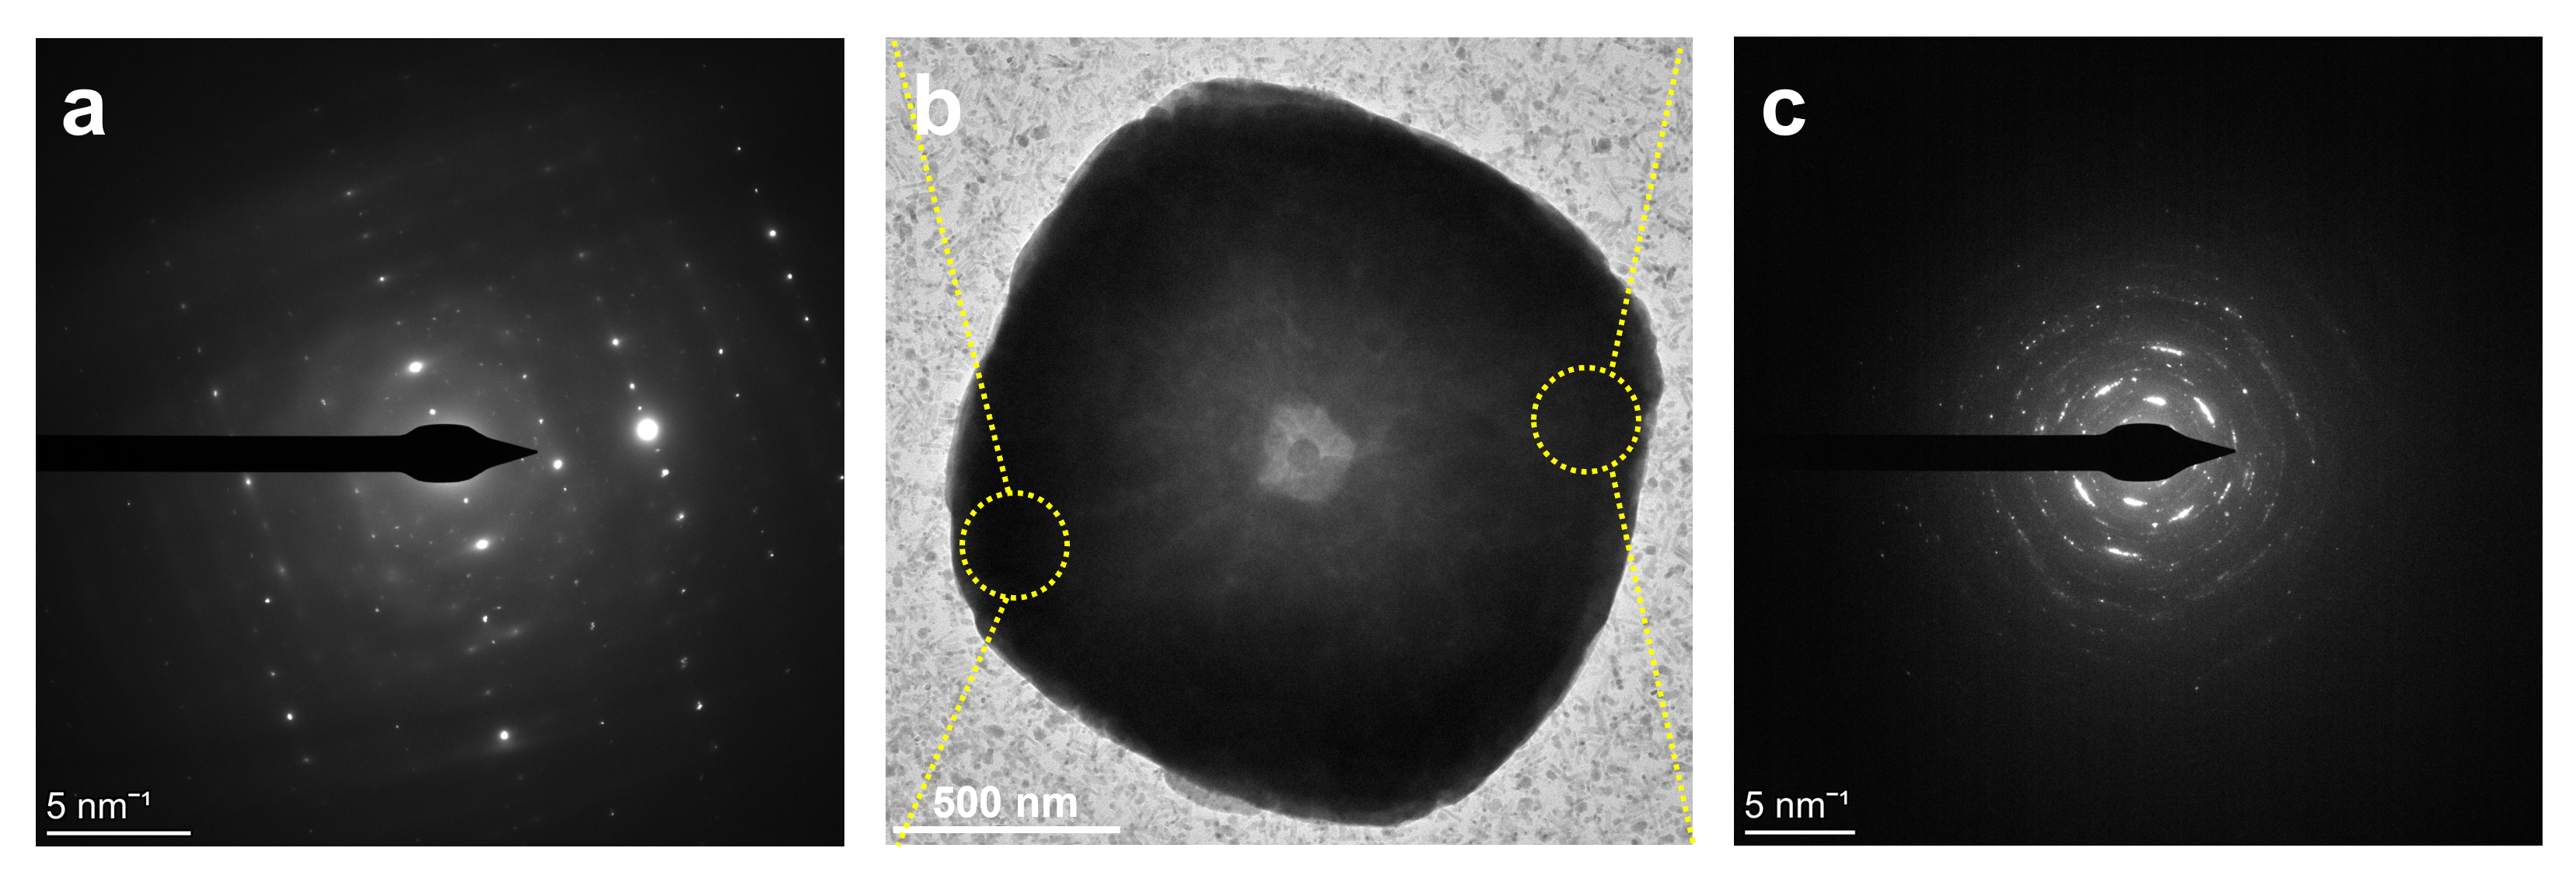


**Supplementary Fig. 8.** (a) SAED patterns obtained from the left area of (b). (b) TEM image of mesocrystalline QD superlattices. (c) SAED patterns obtained from the right area of (b).


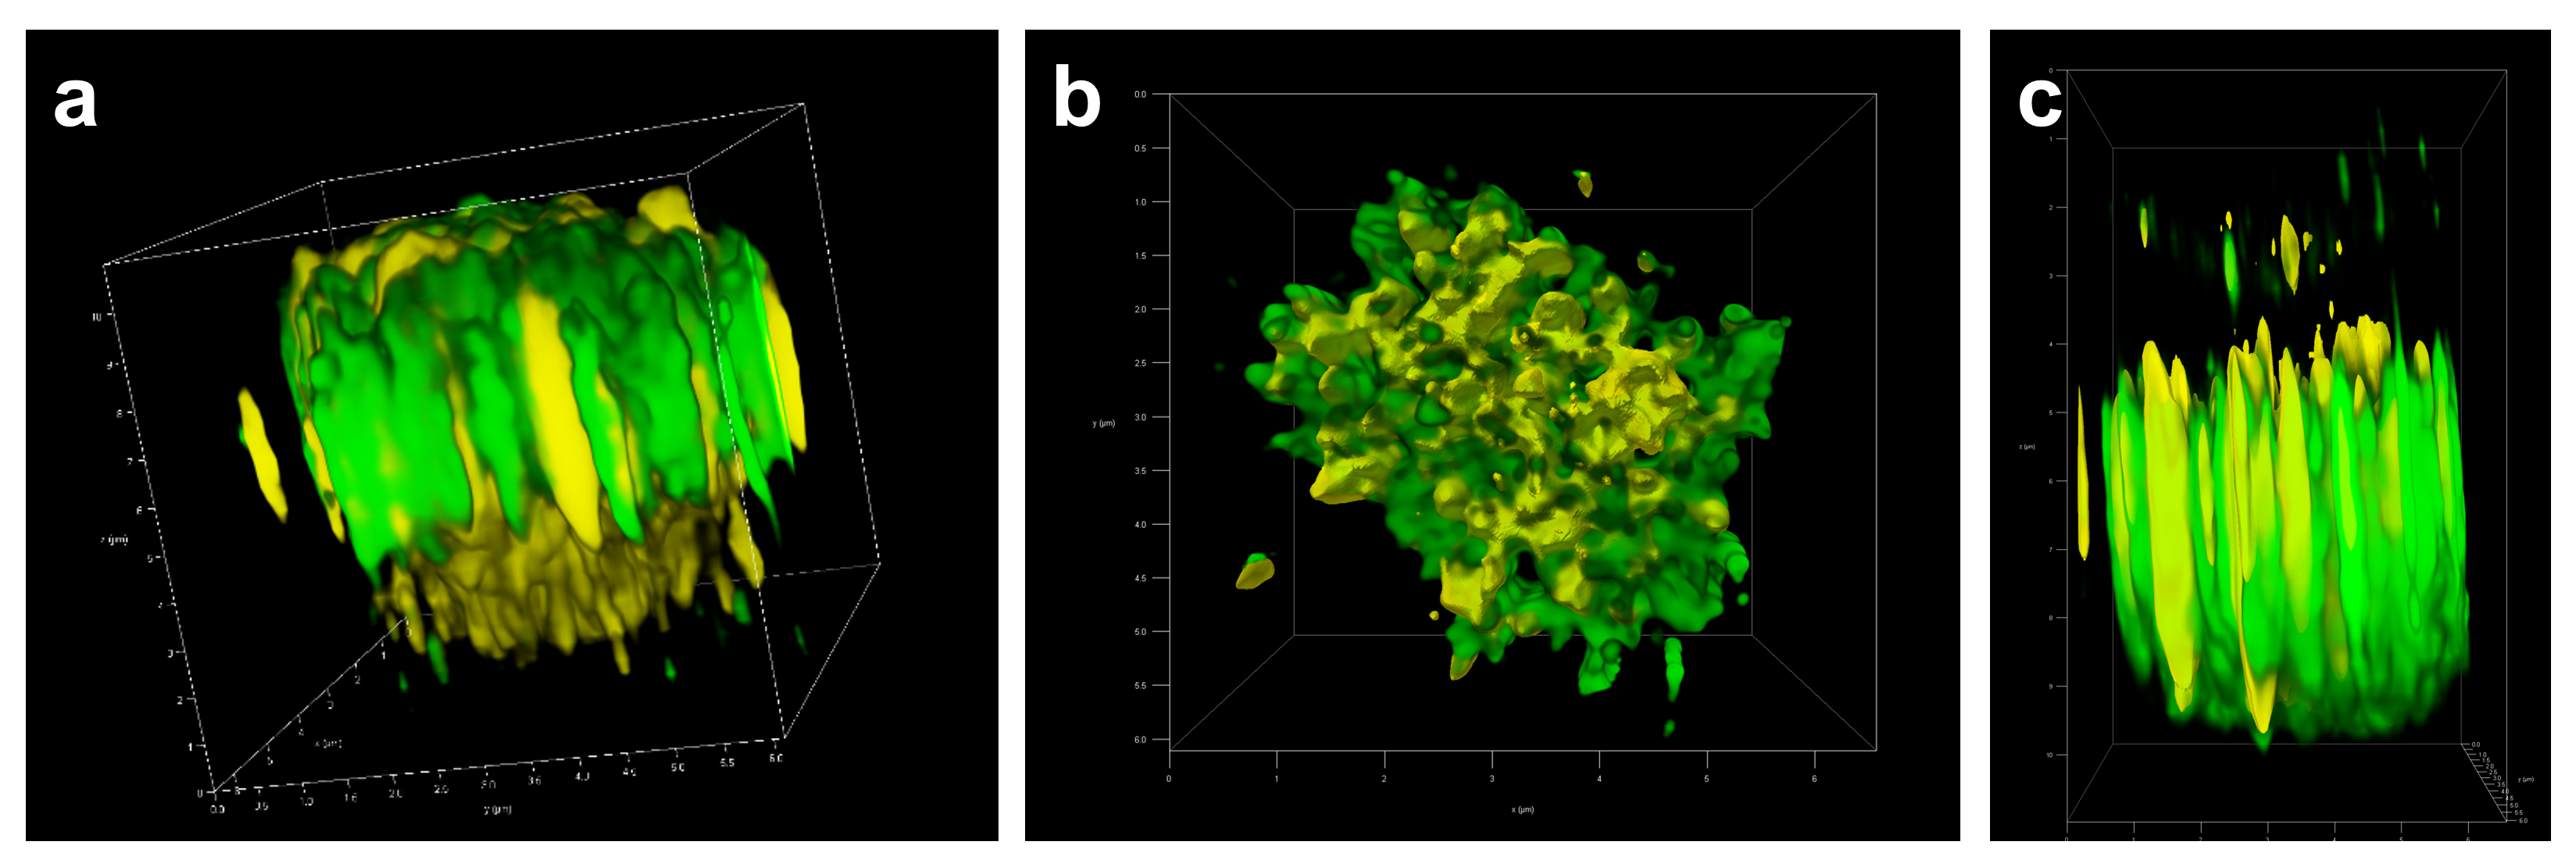


**Supplementary Fig. 9.** Stereo view (a), top view (b) and left view (c) of the 3D construction of a single mesocrystalline QD superlattice’ confocal microscopy imaging.


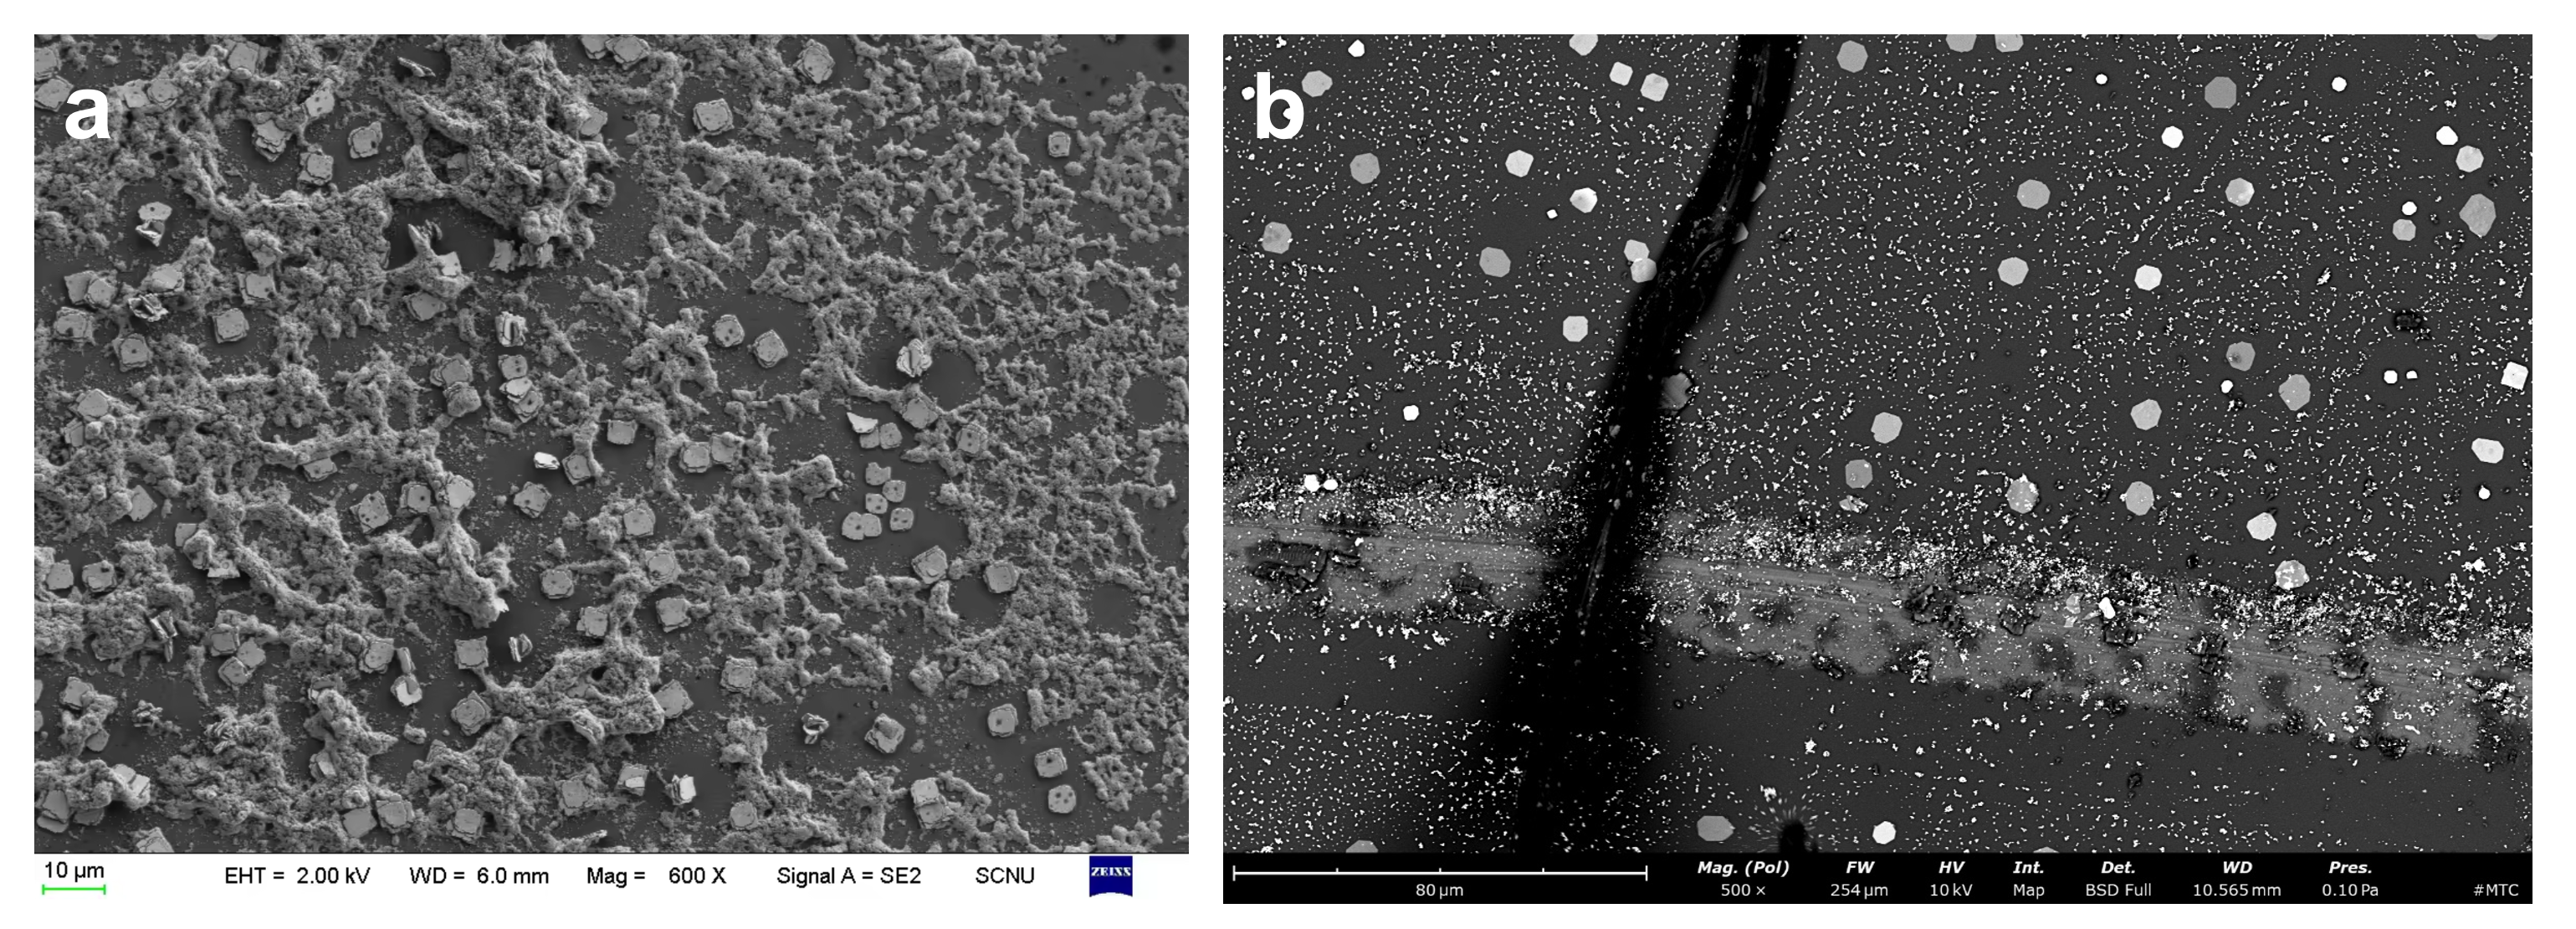


**Supplementary Fig. 10.** SEM images of mesocrystalline QD superlattices annealing at 60 degrees Celsius for 2 (a) and 10 (b) minutes.


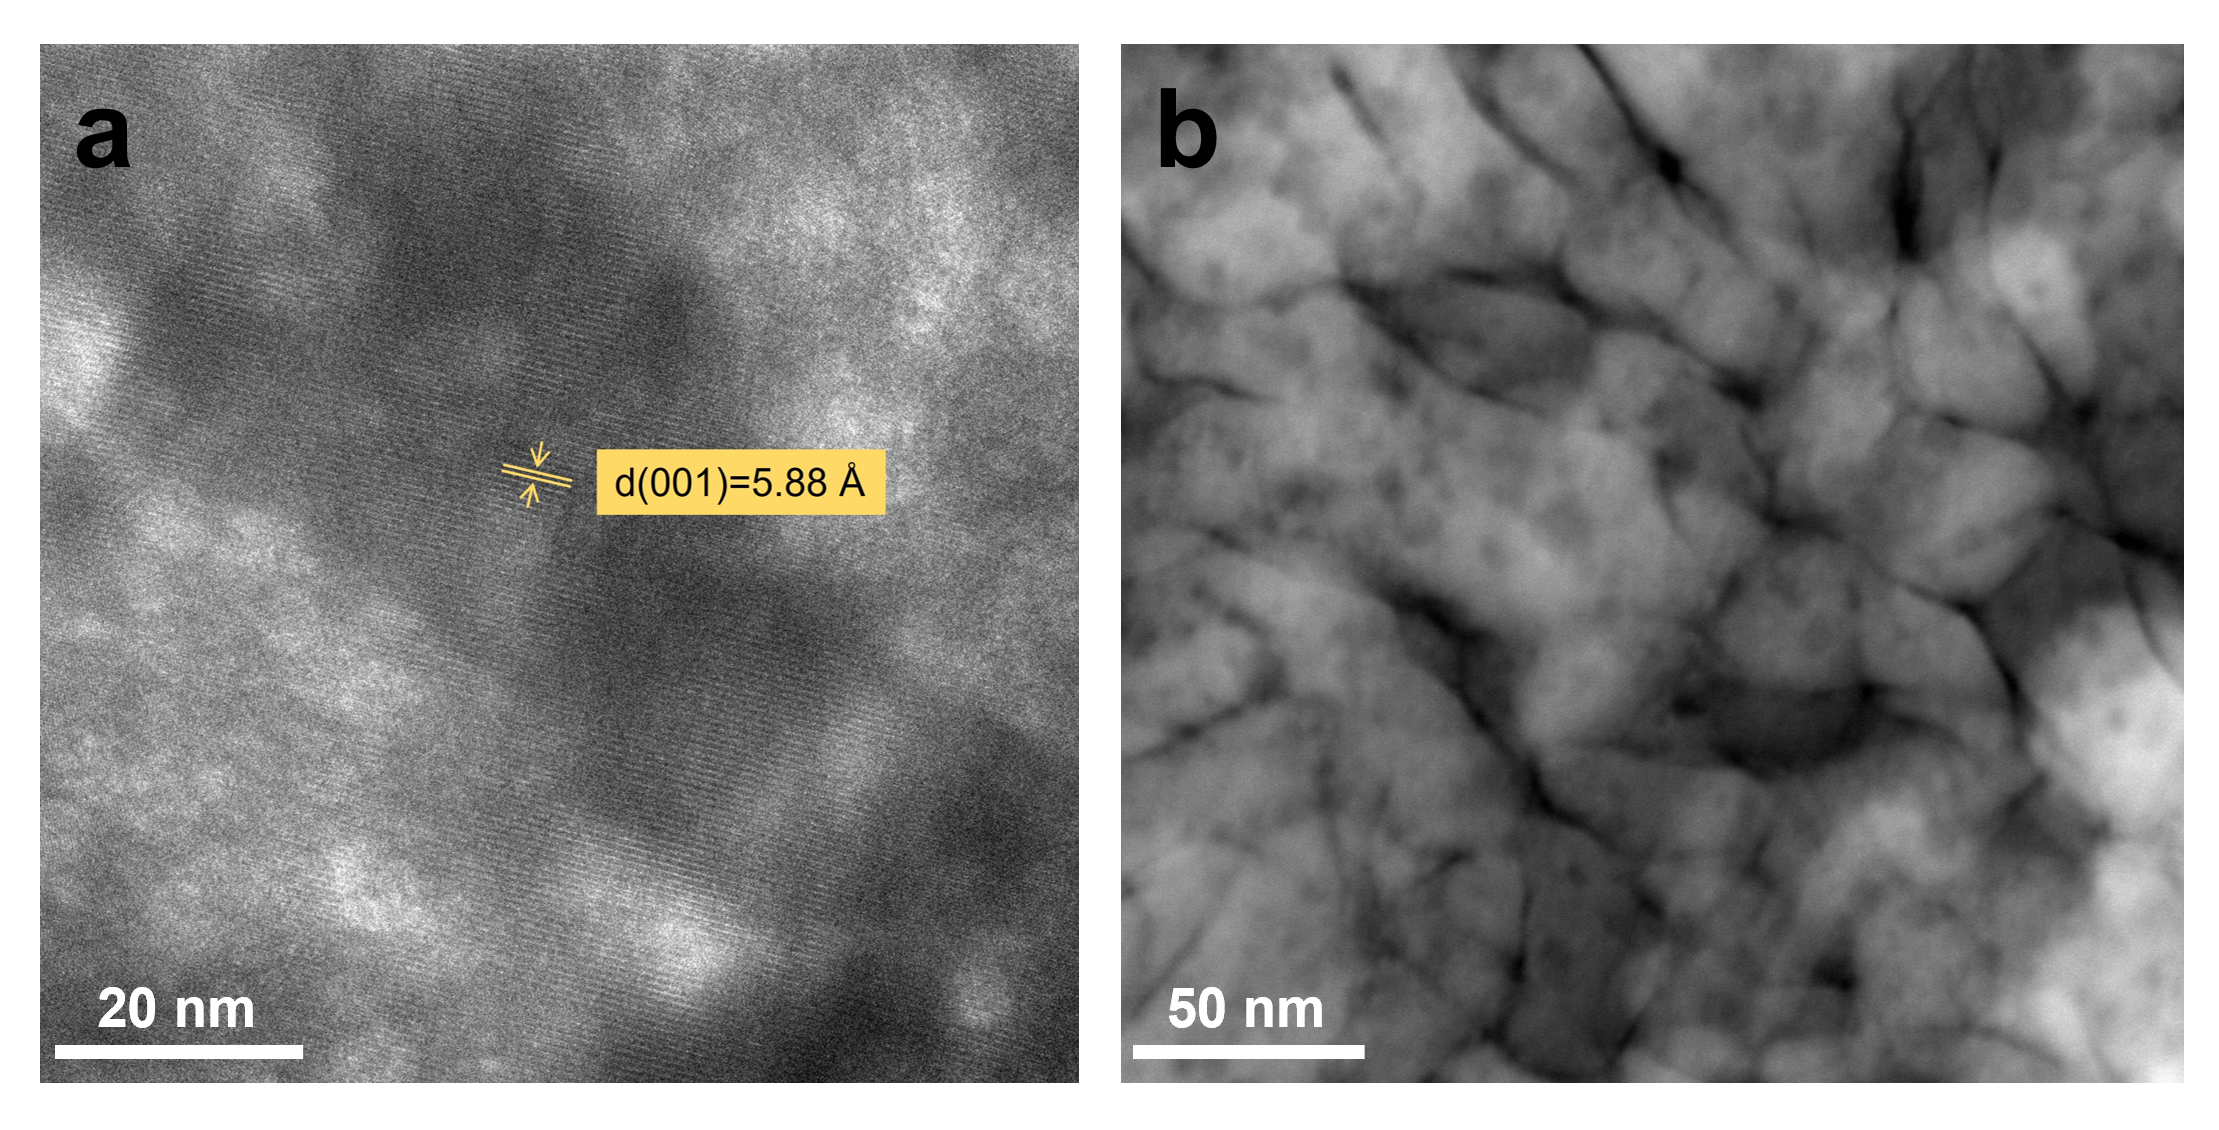


**Supplementary Fig. 11.** HR-TEM (a) and STEM (b) patterns obtained from the central area of the same mesocrystalline QD superlattice.


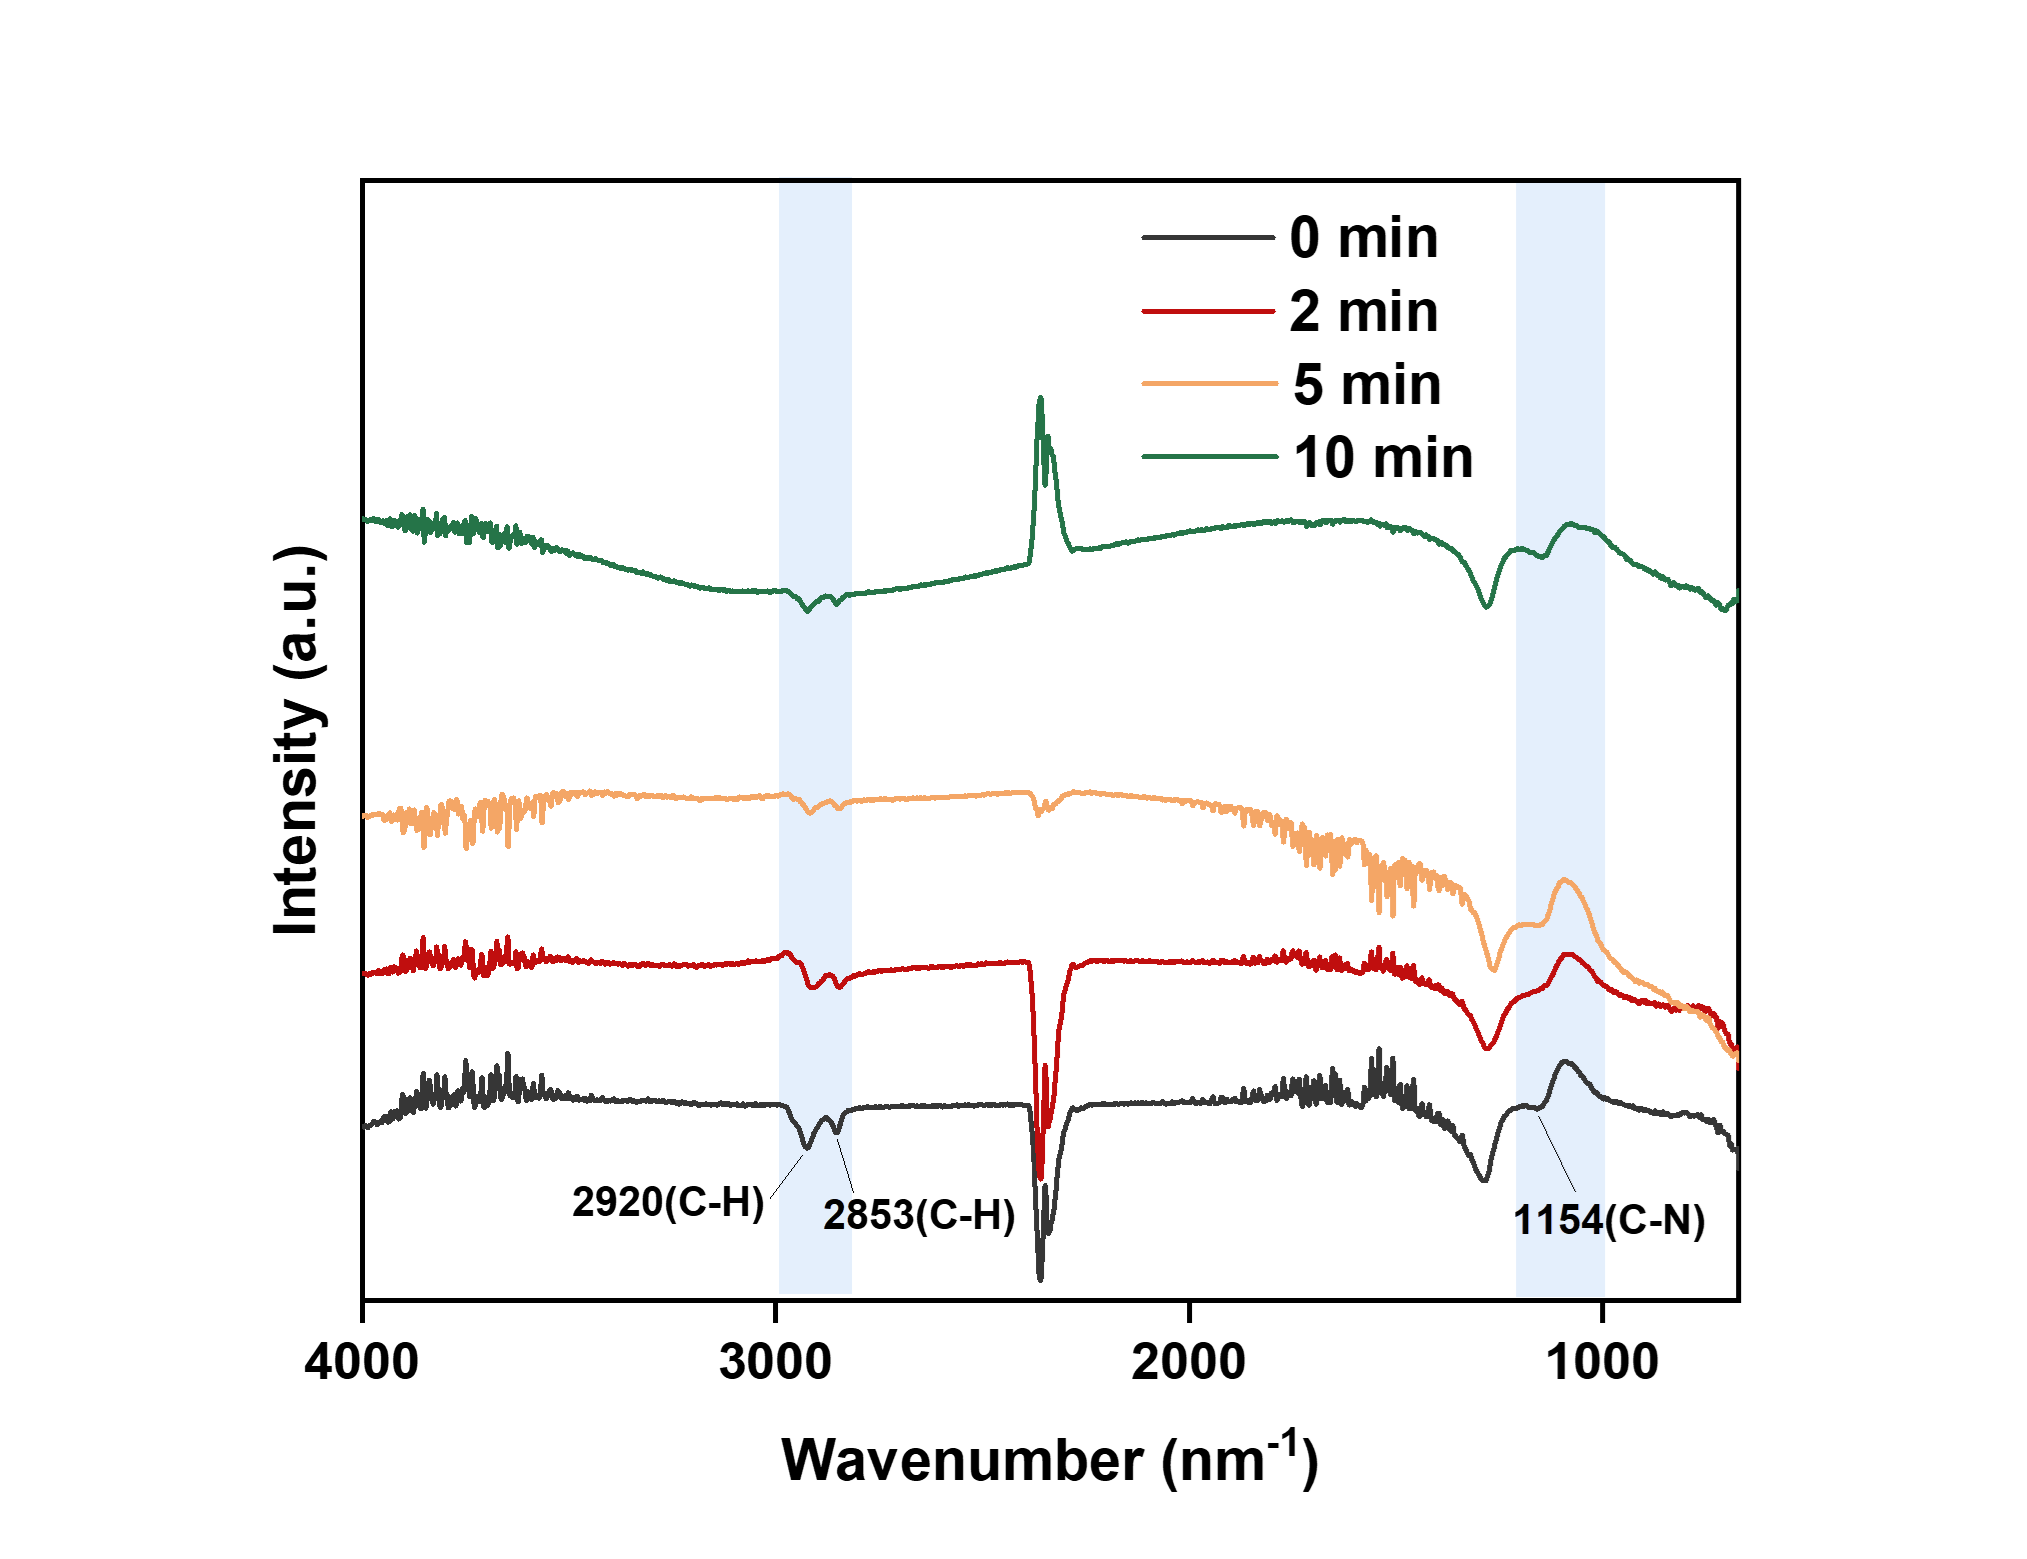


**Supplementary Fig. 12.** IN-SITU FT-IR change of mesocrystalline QD superlattices with annealing time at 60 ℃.


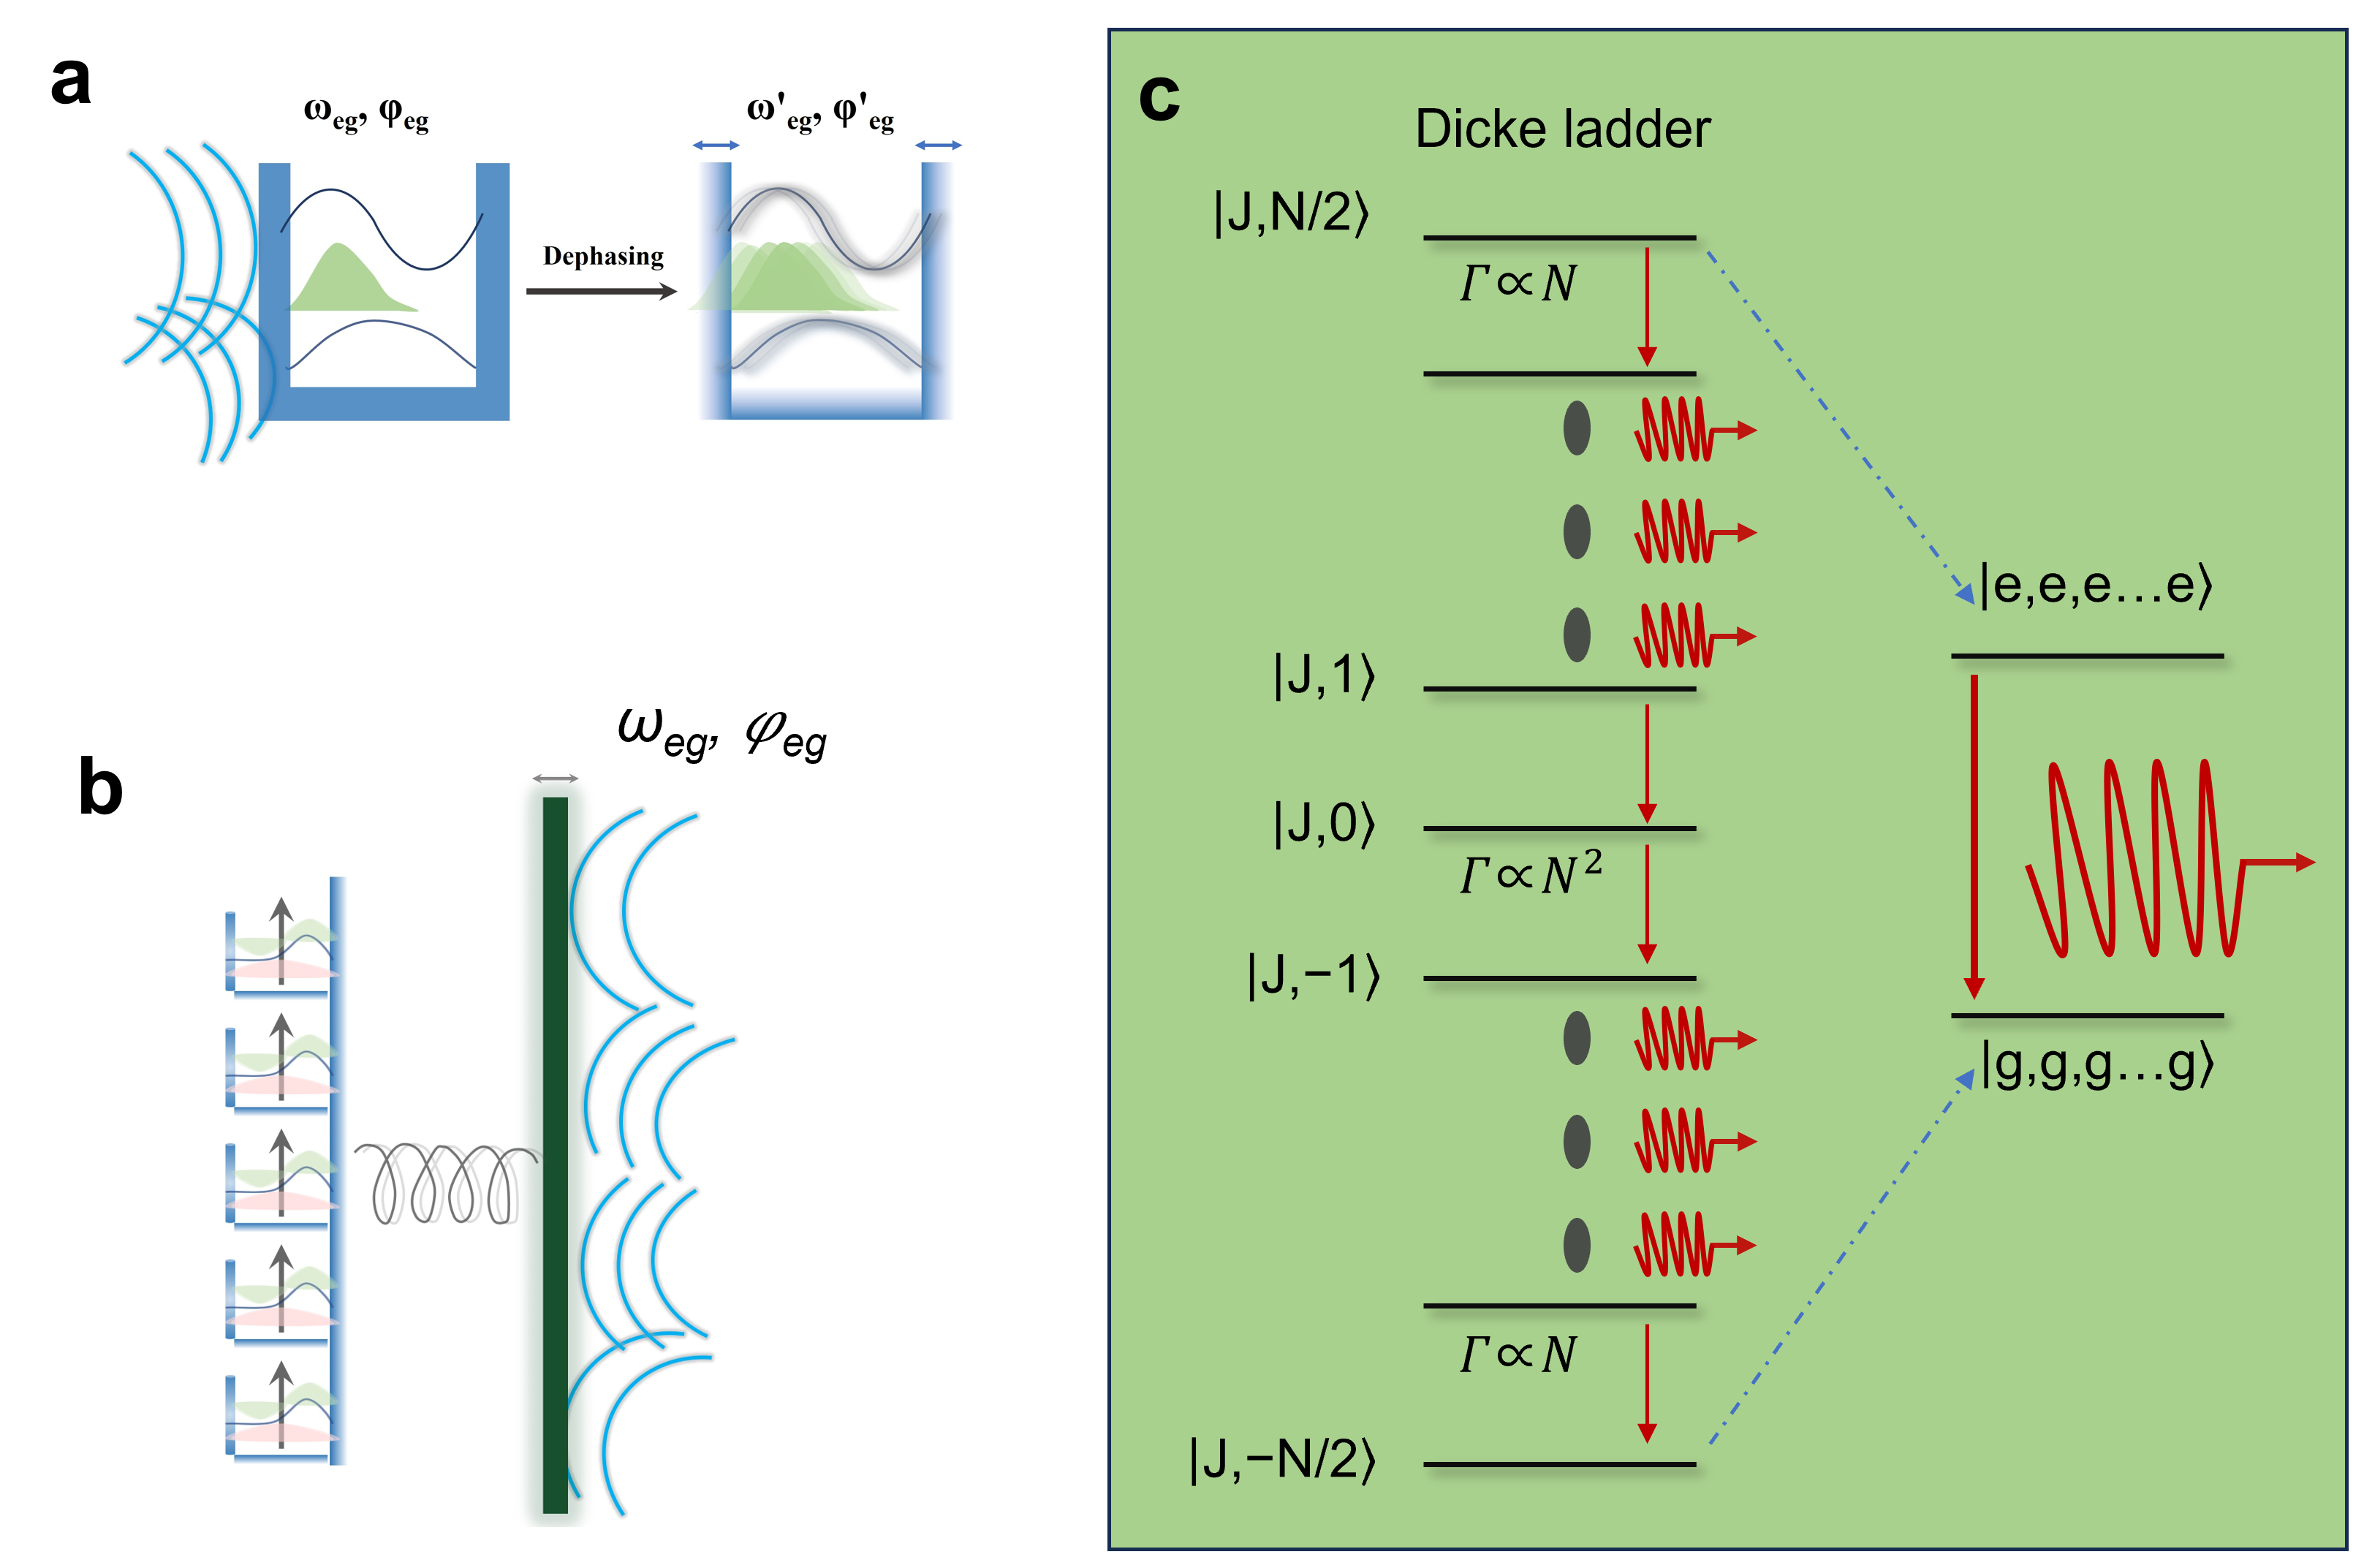


**Supplementary Fig. 13.** (a) Multiple boxes attached to the strongest-coupled lattice distortion mode that promotes coherence between the dipoles. (b) This leads to a macroscopic state, forming a ‘giant dipole’ that radiates a superfluorescent burst. (c) The coherent population forms a giant atom, with its relaxation path following the states in a Dicke ladder


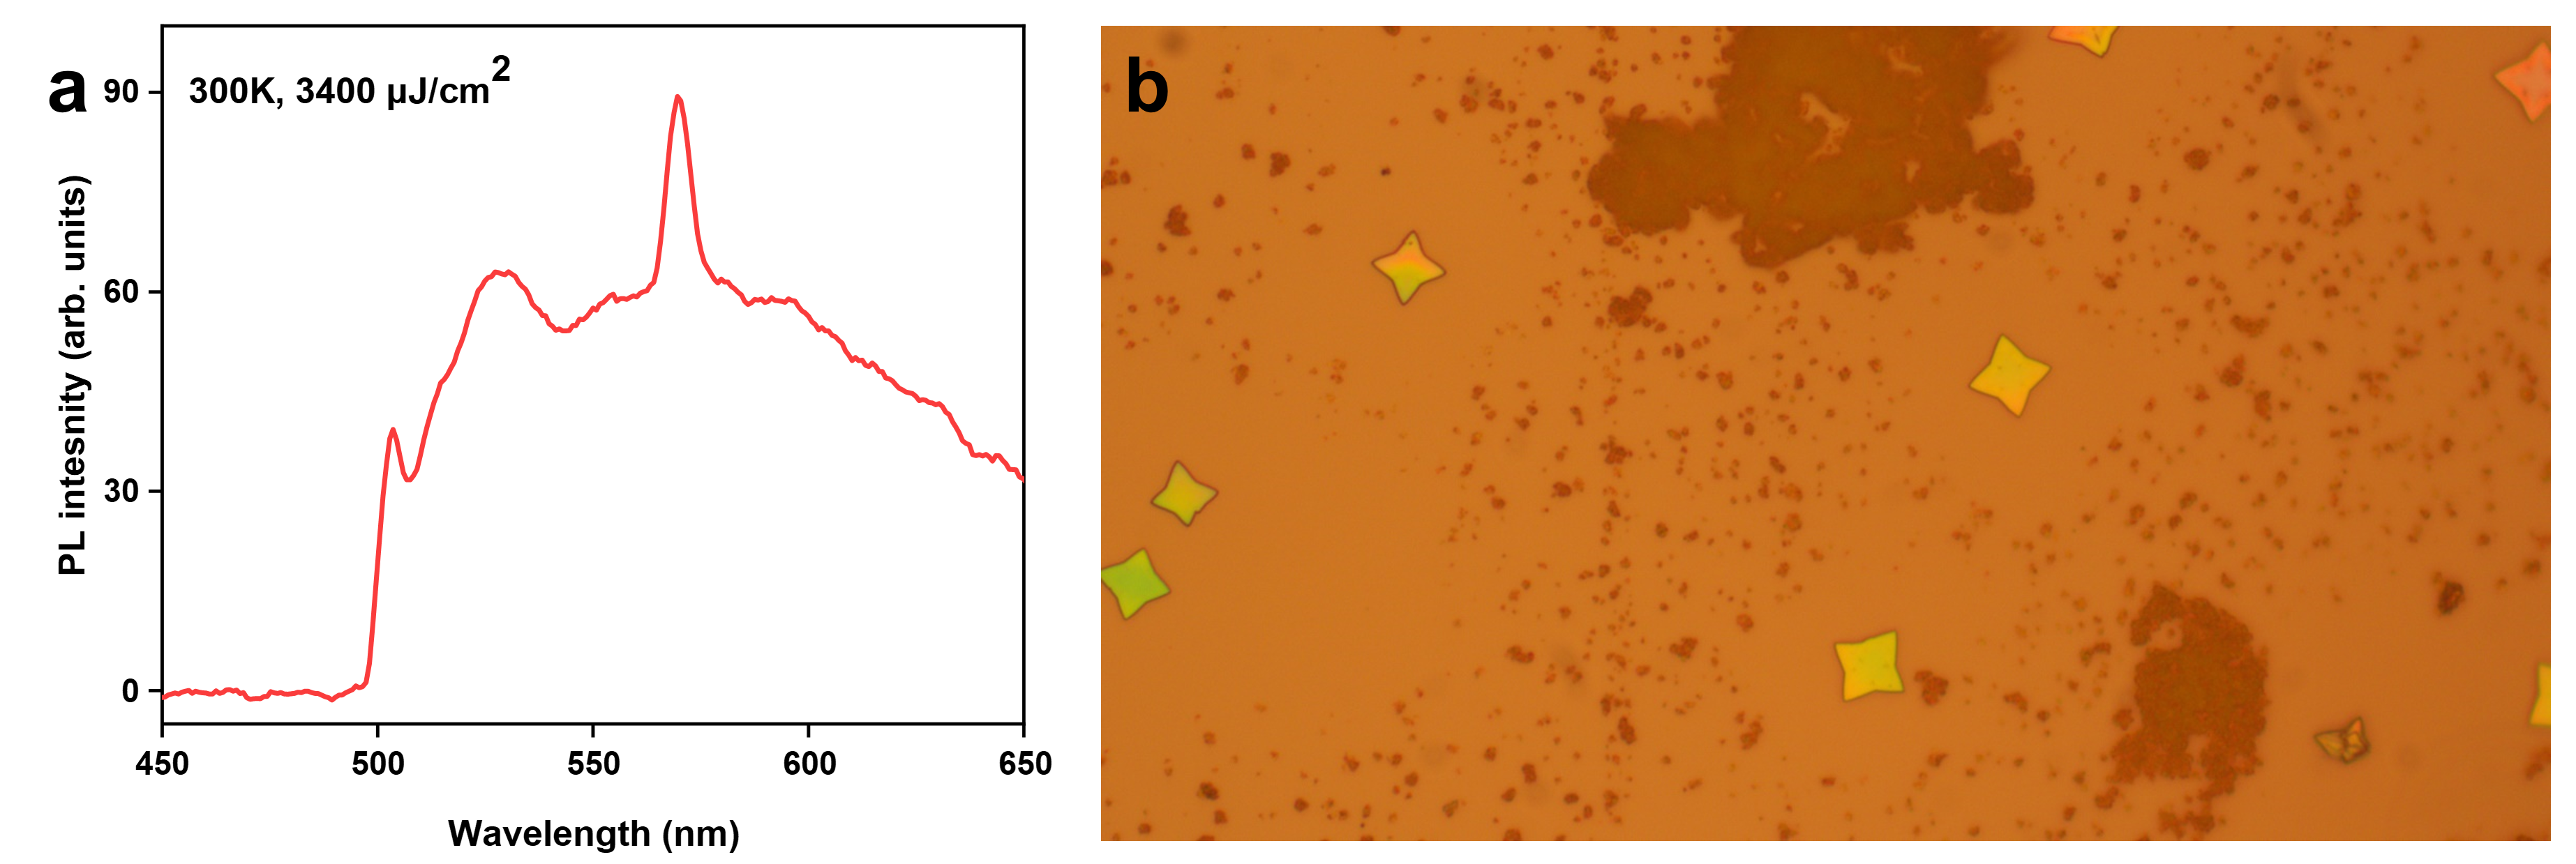
**Supplementary Fig. 14.** Fluorescence spectra (a) and morphology (b) of over-aged mesocrystalline QD superlatticesline QD superlattices.


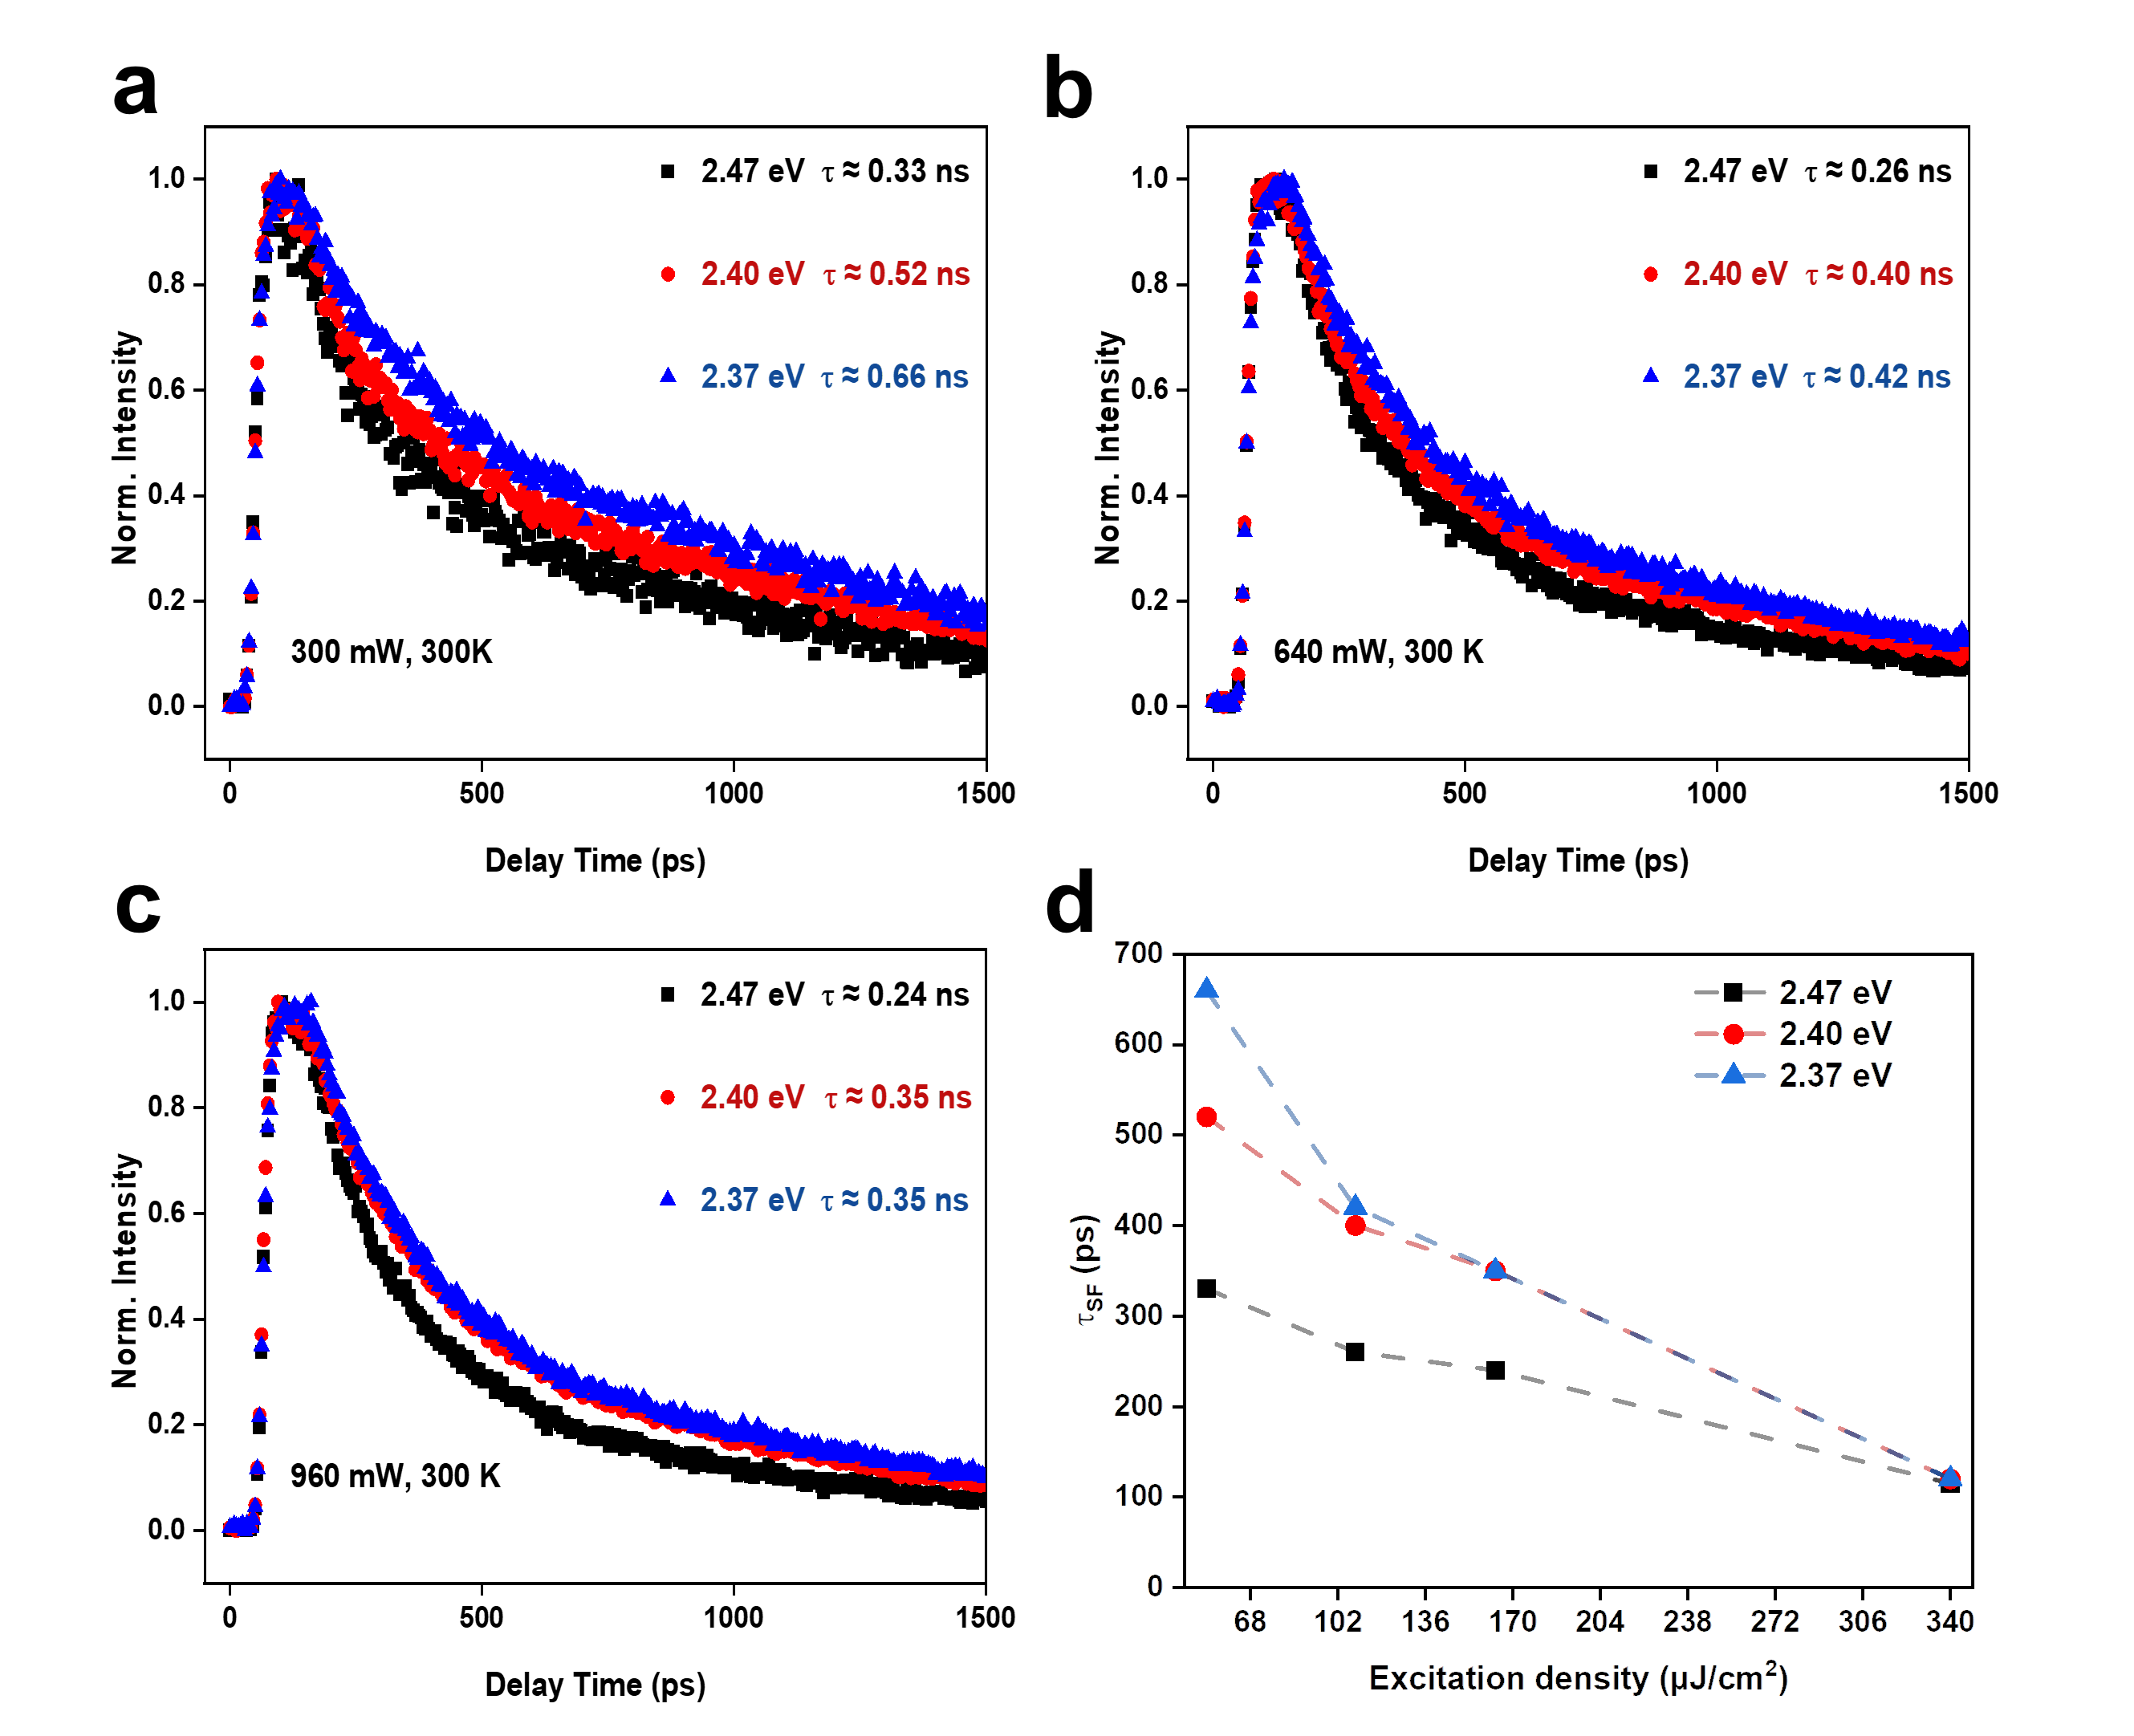


**Supplementary Fig. 15.** SF decay dynamics as the change of the excitation power density in the same mesocrystal.
